# Supplementary material for: What supports and constrains the implementation of multifactorial falls risk assessment and tailored multifactorial falls prevention interventions in acute hospitals? Protocol for a realist review
Source: PubMed Central journal article supplement (PMC8413962; doi:10.1136/bmjopen-2021-049765), 2021-09-02
Supplement: bmjopen-2021-049765.draft_revisions.pdf [file bmjopen-2021-049765.draft_revisions.pdf]

# BMJ Open

BMJ Open is committed to open peer review. As part of this commitment we make the peer review history of every article we publish publicly available.

When an article is published we post the peer reviewers' comments and the authors' responses online. We also post the versions of the paper that were used during peer review. These are the versions that the peer review comments apply to.

The versions of the paper that follow are the versions that were submitted during the peer review process. They are not the versions of record or the final published versions. They should not be cited or distributed as the published version of this manuscript.

BMJ Open is an open access journal and the full, final, typeset and author-corrected version of record of the manuscript is available on our site with no access controls, subscription charges or pay-per-view fees (<http://bmjopen.bmj.com>).

If you have any questions on BMJ Open's open peer review process please email [info.bmjopen@bmj.com](mailto:info.bmjopen@bmj.com)

# BMJ Open

## What supports and constrains the implementation of multifactorial falls risk assessment and tailored multifactorial falls prevention interventions in acute hospitals? Protocol for a realist review

|                               |                                                                                                                                                                                                                                                                                                                                                                                                                                                                                                                                                                                                                                                                                                                                                                                                                                                                                                    |
|-------------------------------|----------------------------------------------------------------------------------------------------------------------------------------------------------------------------------------------------------------------------------------------------------------------------------------------------------------------------------------------------------------------------------------------------------------------------------------------------------------------------------------------------------------------------------------------------------------------------------------------------------------------------------------------------------------------------------------------------------------------------------------------------------------------------------------------------------------------------------------------------------------------------------------------------|
| Journal:                      | <i>BMJ Open</i>                                                                                                                                                                                                                                                                                                                                                                                                                                                                                                                                                                                                                                                                                                                                                                                                                                                                                    |
| Manuscript ID                 | bmjopen-2021-049765                                                                                                                                                                                                                                                                                                                                                                                                                                                                                                                                                                                                                                                                                                                                                                                                                                                                                |
| Article Type:                 | Protocol                                                                                                                                                                                                                                                                                                                                                                                                                                                                                                                                                                                                                                                                                                                                                                                                                                                                                           |
| Date Submitted by the Author: | 01-Feb-2021                                                                                                                                                                                                                                                                                                                                                                                                                                                                                                                                                                                                                                                                                                                                                                                                                                                                                        |
| Complete List of Authors:     | Randell, Rebecca; University of Bradford, Faculty of Health Studies; Wolfson Centre for Applied Health Research<br>Wright, Judy; University of Leeds<br>Alvarado, Natasha; University of Bradford; Wolfson Institute for Applied Health Research<br>Healey, Frances ; NHS Improvement<br>Dowding, Dawn; The University of Manchester<br>Smith, Heather; Leeds Teaching Hospitals NHS Trust, Medicines Management & Pharmacy Services<br>Hardiker, Nick; University of Huddersfield<br>Gardner, Peter; University of Bradford; Wolfson Centre for Applied Health Research<br>Ward, Sue; Manchester University NHS Foundation Trust<br>Todd, Chris; The University of Manchester<br>Zaman, Hadar; University of Bradford<br>McVey, Lynn; University of Bradford; Wolfson Centre for Applied Health Research<br>Davey, Christopher; University of Bradford<br>Woodcock, David; University of Bradford |
| Keywords:                     | GERIATRIC MEDICINE, Health & safety < HEALTH SERVICES ADMINISTRATION & MANAGEMENT, Protocols & guidelines < HEALTH SERVICES ADMINISTRATION & MANAGEMENT, Quality in health care < HEALTH SERVICES ADMINISTRATION & MANAGEMENT, Risk management < HEALTH SERVICES ADMINISTRATION & MANAGEMENT                                                                                                                                                                                                                                                                                                                                                                                                                                                                                                                                                                                                       |
|                               |                                                                                                                                                                                                                                                                                                                                                                                                                                                                                                                                                                                                                                                                                                                                                                                                                                                                                                    |

SCHOLARONE™  
Manuscripts

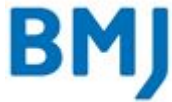

I, the Submitting Author has the right to grant and does grant on behalf of all authors of the Work (as defined in the below author licence), an exclusive licence and/or a non-exclusive licence for contributions from authors who are: i) UK Crown employees; ii) where BMJ has agreed a CC-BY licence shall apply, and/or iii) in accordance with the terms applicable for US Federal Government officers or employees acting as part of their official duties; on a worldwide, perpetual, irrevocable, royalty-free basis to BMJ Publishing Group Ltd ("BMJ") its licensees and where the relevant Journal is co-owned by BMJ to the co-owners of the Journal, to publish the Work in this journal and any other BMJ products and to exploit all rights, as set out in our [licence](#).

The Submitting Author accepts and understands that any supply made under these terms is made by BMJ to the Submitting Author unless you are acting as an employee on behalf of your employer or a postgraduate student of an affiliated institution which is paying any applicable article publishing charge ("APC") for Open Access articles. Where the Submitting Author wishes to make the Work available on an Open Access basis (and intends to pay the relevant APC), the terms of reuse of such Open Access shall be governed by a Creative Commons licence – details of these licences and which [Creative Commons](#) licence will apply to this Work are set out in our licence referred to above.

Other than as permitted in any relevant BMJ Author's Self Archiving Policies, I confirm this Work has not been accepted for publication elsewhere, is not being considered for publication elsewhere and does not duplicate material already published. I confirm all authors consent to publication of this Work and authorise the granting of this licence.

1  
2  
3 1 **What supports and constrains the implementation of multifactorial falls risk assessment**  
4  
5  
6 2 **and tailored multifactorial falls prevention interventions in acute hospitals? Protocol for a**  
7  
8 3 **realist review**  
9

10  
11 4  
12  
13 5 **Authors:**  
14

15 6 Corresponding author: Rebecca Randell, Faculty of Health Studies, University of Bradford,  
16  
17  
18 7 Bradford, BD7 1DP, UK r.randell@bradford.ac.uk  
19

20 8 Judy Wright, Leeds Institute of Health Sciences, University of Leeds, Leeds  
21  
22  
23 9 j.m.wright@leeds.ac.uk  
24

25 10 Natasha Alvarado, Faculty of Health Studies, University of Bradford, Bradford,  
26  
27  
28 11 n.alvarado@bradford.ac.uk  
29

30 12 Frances Healey, NHS England and NHS Improvement, London, frances.healey@nhs.net  
31

32 13 Dawn Dowding, Division of Nursing, Midwifery & Social Work, University of Manchester,  
33  
34  
35 14 Manchester, dawn.dowding@manchester.ac.uk  
36

37 15 Heather Smith, Leeds Teaching Hospitals NHS Trust, Leeds, heather.smith11@nhs.net  
38

39  
40 16 Nick Hardiker, University of Huddersfield, Huddersfield, n.hardiker@hud.ac.uk  
41

42 17 Peter Gardner, Faculty of Life Sciences, University of Bradford, Bradford,  
43  
44  
45 18 p.h.gardner@bradford.ac.uk  
46

47 19 Sue Ward, Manchester University NHS Foundation Trust, Manchester, sue.ward@mft.nhs.uk  
48

49 20 Chris Todd, Division of Nursing, Midwifery & Social Work, University of Manchester,  
50  
51  
52 21 Manchester, chris.todd@manchester.ac.uk  
53

54 22 Hadar Zaman, Faculty of Life Sciences, University of Bradford, Bradford,  
55  
56  
57 23 h.zaman4@bradford.ac.uk  
58  
59  
60

1  
2  
3  
4  
5  
6  
7  
8  
9  
10  
11  
12  
13  
14  
15  
16  
17  
18  
19  
20  
21  
22  
23  
24  
25  
26  
27  
28  
29  
30  
31  
32  
33  
34  
35  
36  
37  
38  
39  
40  
41  
42  
43  
44  
45  
46  
47  
48  
49  
50  
51  
52  
53  
54  
55  
56  
57  
58  
59  
60

24 Lynn McVey, Faculty of Health Studies, University of Bradford, Bradford,

25 l.mvvey@bradford.ac.uk

26 Chris Davey, Faculty of Life Sciences, University of Bradford, Bradford,

27 c.j.davey1@bradford.ac.uk

28 David Woodcock, Lay researcher, dimwoody65@gmail.com

29

30

For peer review only

1  
2  
3 31 I, the Submitting Author has the right to grant and does grant on behalf of all authors of the Work (as  
4 32 defined in the below author licence), an exclusive licence and/or a non-exclusive licence for  
5 33 contributions from authors who are: i) UK Crown employees; ii) where BMJ has agreed a CC-BY licence  
6 34 shall apply, and/or iii) in accordance with the terms applicable for US Federal Government officers or  
7 35 employees acting as part of their official duties; on a worldwide, perpetual, irrevocable, royalty-free  
8 36 basis to BMJ Publishing Group Ltd ("BMJ") its licensees and where the relevant Journal is co-owned  
9 37 by BMJ to the co-owners of the Journal, to publish the Work in BMJ Open and any other BMJ products  
10 38 and to exploit all rights, as set out in our licence.  
11  
12  
13  
14  
15  
16  
17  
18  
19

20 40 The Submitting Author accepts and understands that any supply made under these terms is made by  
21 41 BMJ to the Submitting Author unless you are acting as an employee on behalf of your employer or a  
22 42 postgraduate student of an affiliated institution which is paying any applicable article publishing charge  
23 43 ("APC") for Open Access articles. Where the Submitting Author wishes to make the Work available on  
24 44 an Open Access basis (and intends to pay the relevant APC), the terms of reuse of such Open Access  
25 45 shall be governed by a Creative Commons licence – details of these licences and which Creative  
26 46 Commons licence will apply to this Work are set out in our licence referred to above.  
27  
28  
29  
30  
31  
32  
33  
34  
35  
36  
37  
38  
39  
40  
41  
42  
43  
44  
45  
46  
47

1  
2  
3 48 **Abstract**  
4

5 49 **Introduction:** Falls are the most common type of safety incident reported by acute hospitals  
6  
7  
8 50 and can cause both physical (e.g. hip fractures) and non-physical harm (e.g. reduced  
9  
10 51 confidence) to patients. It is recommended that, in order to prevent falls in hospital, patients  
11  
12  
13 52 should receive a multifactorial falls risk assessment and be provided with a multifactorial  
14  
15 53 intervention, tailored to address the patient's identified individual risk factors. It is estimated  
16  
17 54 that such an approach could reduce the incidence of inpatient falls by 25-30% and reduce the  
18  
19 55 annual cost of falls by up to 25%. However, there is substantial unexplained variation between  
20  
21 56 hospitals in the number and type of assessments undertaken and interventions implemented.  
22  
23

24  
25 57 **Methods and analysis:** A realist review will be undertaken to construct and test programme  
26  
27 58 theories regarding (1) what supports and constrains the implementation of multifactorial falls  
28  
29 59 risk assessment and tailored multifactorial falls prevention interventions in acute hospitals;  
30  
31 60 and (2) how, why, in what contexts, and for whom tailored multifactorial falls prevention  
32  
33 61 interventions lead to a reduction in patients' falls risk. We will first identify stakeholders'  
34  
35 62 theories concerning these two topics. We will then test these theories systematically, using  
36  
37 63 primary studies to determine whether empirical evidence supports, refutes, or suggests a  
38  
39 64 revision or addition to the identified theories.  
40  
41  
42  
43

44  
45 65 **Ethics and dissemination:** The study does not require ethical approval. The review will  
46  
47 66 provide evidence for how to implement multifactorial falls risk assessment and prevention  
48  
49 67 strategies in acute hospital settings. This will be disseminated to academic and clinical  
50  
51 68 audiences and will provide the basis for a future multi-site study through which the theories  
52  
53 69 will be further refined.  
54  
55

56  
57 70 **Systematic review registration:** PROSPERO CRD42020184458.  
58  
59  
60

1  
2  
3 72 **Keywords:** Realist review, falls, risk assessment, hospitals, implementation  
4  
5

6 73

7  
8 74 **Word count:** 3,334  
9

10 75

## 11 76 **ARTICLE SUMMARY**

### 12 77 **Strengths and limitations of this study**

- 13  
14  
15  
16  
17  
18 78 • Our review will provide a programme theory that explains what supports and  
19  
20 79 constrains implementation of multifactorial falls risk assessment and tailored  
21  
22  
23 80 multifactorial falls prevention interventions in acute hospitals and how, why, in what  
24  
25 81 contexts, and for whom tailored multifactorial falls prevention interventions leads to  
26  
27 82 a reduction in patients' falls risk.
- 28  
29  
30 83 • It will provide evidence that healthcare providers can use to inform their own  
31  
32 84 multifactorial falls risk assessment and prevention strategies, with the potential to  
33  
34  
35 85 reduce frequency of inpatient falls and thereby reduce the impact of both human  
36  
37 86 suffering and healthcare costs.
- 38  
39  
40 87 • We will integrate literature from other settings and concerning interventions with the  
41  
42 88 same mechanisms and use citation searching to identify clusters of related studies, to  
43  
44  
45 89 ensure we have adequate evidence to provide confidence in our findings.
- 46  
47 90 • The possibility of drawing on literature from other settings or concerning  
48  
49 91 interventions with the same mechanism could make the review unwieldy; to mitigate  
50  
51 92 against this, we will consult our lay researchers and Study Steering Committee  
52  
53 93 regarding which CMO configurations to test.  
54  
55  
56  
57  
58  
59  
60

## 94 95 **INTRODUCTION**



1  
2  
3 96 Inpatient falls in acute hospitals are an international patient safety concern. Approximately  
4  
5  
6 97 30-40% of reported safety incidents in acute hospitals are falls (1), and in England falls are the  
7  
8 98 most common type of safety incident reported in acute hospitals (2). Injuries occur in 15-50%  
9  
10  
11 99 of hospital falls and up to 10% of these are serious (1). The proportion of falls resulting in any  
12  
13 100 fracture ranges from 1% to 3%, with reports of hip fracture ranging from 1.1% to 2.0% (3).  
14  
15 101 Outcomes for patients who acquire hip fractures in hospital are far worse than for those who  
16  
17 102 acquire them in the community, with significant differences in mortality, discharge to long-  
18  
19 103 term high-level nursing care facilities, and return to preadmission activity of daily living status  
20  
21  
22 104 (4).

25 105 The human cost of falling also includes fear of falling again and associated loss of confidence  
26  
27 106 (1, 5), loss of independence (6), and social isolation (2). It can result in slower recovery (5),  
28  
29 107 even when physical harm is minimal, and can have longer term consequences for the patient's  
30  
31 108 health, as fear of falling may lead to restriction of activity and associated loss of muscle and  
32  
33 109 balance function, thereby increasing further the risk of falling (1). Falls can also be a cause of  
34  
35 110 significant distress for families and staff (3, 5). Falls in hospital are a common cause of  
36  
37 111 complaints (7) and can be a source of litigation (8). Falls in hospital are also associated with  
38  
39 112 increased length of stay and greater amounts of health resource use (3).

45 113 The traditional approach to managing falls in acute hospitals was to complete a falls risk  
46  
47 114 prediction tool (such as STRATIFY (9)). Such tools typically stratify patients according to their  
48  
49 115 perceived risk of falling (high, medium, low) with interventions targeting individuals at high  
50  
51 116 risk. There are, however, issues with this approach to risk evaluation for falls, in particular the  
52  
53 117 issue of discrimination, where all patients on the unit are identified as high risk, and that  
54  
55 118 having a score provides reassurance that action is being taken when actually it is not (10).  
56  
57  
58  
59  
60

1  
2  
3 119 Given the limitations of risk prediction tools, in the United Kingdom, the National Institute  
4  
5  
6 120 for Health and Care Excellence (NICE) guideline on falls in older people states that falls risk  
7  
8 121 prediction tools should not be used and instead a multifactorial falls risk assessment should  
9  
10  
11 122 be undertaken (11). Rather than categorising a patient according to their perceived risk of  
12  
13 123 falling, this approach to assessment identifies individual risk factors for each patient which  
14  
15 124 may make them at risk of falling and that can be treated, improved or managed during their  
16  
17  
18 125 stay. This may include: cognitive impairment; continence problems; falls history, including  
19  
20 126 causes and consequences (e.g. injury and fear of falling); footwear that is unsuitable or  
21  
22  
23 127 missing; health problems that may increase their risk of falling; medication; postural  
24  
25 128 instability, mobility problems and/or balance problems; syncope syndrome; and visual  
26  
27  
28 129 impairment. The NICE guideline states that a multifactorial falls risk assessment should be  
29  
30 130 undertaken for all inpatients 65 years or older and inpatients aged 50 to 64 years judged to  
31  
32 131 be at higher risk of falling due to an underlying condition. On the basis of this assessment, a  
33  
34  
35 132 multifactorial intervention should be provided, tailored to address the patient's identified  
36  
37 133 individual risk factors. It is estimated that such an approach could reduce the incidence of  
38  
39  
40 134 inpatient falls by 25-30% and reduce the significant annual cost of falls – estimated at £630  
41  
42 135 million – by up to 25% (2).

43  
44  
45 136 Even though the NICE guideline has included these recommendations since 2013, there is  
46  
47 137 substantial unexplained variation between National Health Service (NHS) hospitals in England  
48  
49  
50 138 and Wales, in terms of the number and type of assessments and interventions undertaken  
51  
52 139 (5). In assessment, 32% of healthcare providers are still using risk screening tools to identify  
53  
54 140 those at risk of falls (12). Improvement was found between 2015 and 2017 in the proportion  
55  
56  
57 141 of older patients receiving these assessment and interventions but for some of these  
58  
59 142 remained concerningly low. These include cognitive impairment assessment (58.5%), delirium  
60

1  
2  
3 143 assessment (39.7%), medications assessment (47.8%), and vision assessment (46.2%). In  
4  
5  
6 144 interventions, there was improvement in the presence of interventions where required for  
7  
8 145 cognitive impairment and delirium, although rates remained low (43.7% and 48.7%  
9  
10  
11 146 respectively), but no overall significant change in the presence of tailored continence care  
12  
13 147 plans (66.9%) or mobility interventions (78.8%) for those patients who required them.

14  
15 148 Given this variation, there is a need to understand the contextual factors that support and  
16  
17  
18 149 constrain the implementation of multifactorial falls risk assessment and tailored  
19  
20  
21 150 multifactorial falls prevention interventions in an acute hospital setting, in order to improve  
22  
23 151 practice. However, even if tailored multifactorial falls prevention interventions are  
24  
25 152 implemented, contextual factors may constrain their use, so that they do not achieve the  
26  
27  
28 153 desired impact. For example, several studies suggest patient adherence to inpatient falls  
29  
30 154 prevention strategies depends on a range of contextual factors including patient willingness  
31  
32 155 to ask for assistance, with some patients not wishing to 'bother' staff (13) or not accepting  
33  
34  
35 156 that they are at risk of falling (14-17). Therefore, in this paper, we present the protocol for a  
36  
37 157 realist review that aims to determine:

- 38  
39  
40 158 1. What supports and constrains the implementation of multifactorial falls risk assessment  
41  
42 159 and tailored multifactorial falls prevention interventions in acute hospitals; and  
43  
44  
45 160 2. How, why, in what contexts, and for whom tailored multifactorial falls prevention  
46  
47 161 interventions lead to a reduction in patients' falls risk.

48  
49  
50 162 This protocol has been written in accordance with PRISMA-P guidelines (Additional file 1).

51  
52 163

## 53 54 164 **METHODS AND ANALYSIS**

55  
56  
57 165 We will undertake a realist review. Realist review is a literature review method that  
58  
59 166 represents a divergence from traditional systematic review methodology (18). It starts by  
60

1  
2  
3 167 identifying stakeholders' theories and then uses empirical evidence to systematically evaluate  
4  
5  
6 168 these, allowing us to compare how an intervention is intended to work with how it actually  
7  
8 169 works in practice. For realists, interventions do not produce outcomes. Rather, interventions  
9  
10  
11 170 offer resources; outcomes depend on how recipients respond to those resources, which will  
12  
13 171 vary according to the context. Realist theories, referred to as Context-Mechanism-Outcome  
14  
15 172 (CMO) configurations, explain how different contexts trigger particular intervention  
16  
17  
18 173 mechanisms (the reasoning and responses of recipients to intervention resources) which, in  
19  
20 174 turn, give rise to a particular pattern of outcomes.

21  
22  
23 175 Realist approaches can be thought of as consisting of three phases: theory elicitation, theory  
24  
25 176 testing, and theory refinement, and we use this structure to describe the process of the realist  
26  
27 177 review.

28  
29  
30 178

### 31 32 179 **Patient and Public Involvement**

33  
34  
35 180 The lay member of the project team (DW) contributed to the design of the study. He has  
36  
37 181 recruited a group of lay researchers (members of the public who will contribute to the  
38  
39 182 conduct of this research) who will provide input into the review, prioritising the theories to  
40  
41  
42 183 be tested in Phase 2 of the review.

43  
44  
45 184

### 46 47 185 **Phase 1: Theory elicitation**

#### 48 49 186 ***Search strategy***

50  
51  
52 187 Searches will be designed by an information specialist with expertise in realist reviews (JW)  
53  
54 188 and peer reviewed by a second information specialist. A combination of free text terms,  
55  
56 189 synonyms and indexing terms will be used. The searches will not be limited by publication  
57  
58  
59 190 date.

1  
2  
3 191 The databases to be searched include:  
4

5 192 • Ovid Medline (1946 – present) and Medline In-Process & Other Non-Indexed Citations  
6  
7

8 193 • Ovid Health Management Information Consortium (1983 – present)  
9

10 194 • EBSCO CINAHL (1981 – present)  
11  
12

13 195 We will undertake the following searches:  
14

15 196 • *Practitioner theories*: Programme theories are likely to be found in editorials, comments,  
16 197 letters, and news articles (19), so searches will be undertaken, using a filter (set of search  
17  
18 198 terms) to limit the search to these publication types (see Additional File 2 for an example  
19  
20 199 search strategy). In addition to searching the databases listed above, we will search  
21  
22 200 relevant professional journals and the websites of professional organisations. Given the  
23  
24 201 range of professional groups potentially involved in falls risk assessment and prevention,  
25  
26 202 a set of professional journals will be selected covering all the relevant professional groups.  
27  
28 203 This is likely to include, for example, the Nursing Standard, the Pharmaceutical Journal,  
29  
30 204 Frontline (a professional journal for physiotherapists), and Optometry Today. Websites  
31  
32 205 for professional organisations, including the British Geriatrics Society, the Royal College  
33  
34 206 of Nursing, and the Royal Pharmaceutical Society, will be searched. Searches will also be  
35  
36 207 run on Google for reports of quality improvement projects, such as the FallSafe quality  
37  
38 208 improvement project (7).  
39  
40 209 • *Academic theories*: The discussion sections of empirical studies often include the authors'  
41  
42 210 theories about why the intervention did or did not achieve the desired effect (20).  
43  
44 211 Therefore, studies of falls prevention interventions will be searched for, using existing  
45  
46 212 systematic reviews as a starting point. See Additional File 3 for an example search strategy.  
47  
48 213 • *Substantive theories*: We will review articles retrieved in the 'academic theories' search  
49  
50 214 for reference to substantive theory and, if necessary, we will undertake an additional

1  
2  
3 215 search for relevant substantive theories on risk assessment and guideline adherence.  
4

5  
6 216 The records identified in the searches will be saved and managed in an EndNote library.  
7

8 217 Details of all search activities (databases, websites, date of search, number of records found,  
9

10 218 search strategies) will be recorded in a timeline spreadsheet.  
11  
12

13 219

14  
15 220 ***Screening process and inclusion/exclusion criteria***  
16

17  
18 221 A 'liberal accelerated' approach to screening will be taken, where one reviewer reviews all  
19

20 222 records/full text papers and a second reviewer reviews records/full text papers excluded by  
21

22 223 the first reviewer (21). This approach is less time and resource intensive than having two  
23

24 224 reviewers review all records/full text papers while maximising inclusion, increasing the  
25

26 225 number of records/full text papers retained in comparison to a single reviewer (22). Because  
27

28 226 the purpose of this phase of the review is to identify and catalogue programme theories and  
29

30 227 theory fragments, rather than to assess their validity, selection will be based on relevance to  
31

32 228 the topic of the review (18, 19). The inclusion criteria for the 'practitioner theories' and  
33

34 229 'academic theories' searches will be:  
35  
36  
37  
38  
39  
40 230

41  
42 231 • Multifactorial/single factor falls risk assessment or falls risk prediction tools and/or  
43  
44 232 multifactorial/single falls prevention interventions  
45

46  
47 233 • Adults/older people  
48

49  
50 234 • Acute hospital setting  
51

52 235 • Include arguments about what supports or constrains implementation and/or in what  
53  
54 236 contexts and for whom they can/should be used  
55

56  
57 237 • Published in the English language  
58

59  
60 238

1  
2  
3 239 Exclusion criteria will be:  
4  
5

6 240  
7

8 241 • Children and young people  
9

10 242 • Settings other than acute hospital  
11  
12

13 243 • Published in languages other than English  
14  
15

16 244  
17

18 245 We will include articles about single factor risk assessment tools on the basis that  
19

20 246 understanding what supports and constrains their use will inform our understanding of what  
21

22 247 supports and constrains use of multifactorial risk assessment tools. Similarly, we will include  
23

24 248 articles about single falls prevention interventions on the basis that understanding what  
25

26 249 supports and constrains the implementation and use of single interventions will inform our  
27

28 250 understanding of what supports and constrains the implementation and use of multifactorial  
29

30 251 interventions which contain those single interventions as a component. This is in line with the  
31

32 252 realist approach, which seeks to link the responses to an intervention to particular resources  
33

34 253 provided by the intervention. We will also include articles about falls risk prediction tools to  
35

36 254 understand how and in what contexts they continue to be used instead of multifactorial falls  
37

38 255 risk assessments.  
39

40 256 We will exclude articles published in languages other than English because the nature of  
41

42 257 realist review means that we would need to translate the full article, for which the project  
43

44 258 does not have adequate resources. This is in contrast to traditional systematic reviews where  
45

46 259 only defined data needs to be identified and translated (23).  
47

48 260 A PRISMA flow chart detailing the review decision process for Phase 1 will be developed.  
49

50 261  
51

52 262 ***Analysis and synthesis***  
53  
54  
55  
56  
57  
58  
59  
60

1  
2  
3 263 Included articles from the 'practitioner theories' and 'academic theories' searches will be  
4  
5  
6 264 imported into NVivo and coded as context, mechanism, and outcome. Outcomes will include,  
7  
8 265 for example, fall rates, but also any other outcomes reported, to capture both intended and  
9  
10 266 unintended impacts. A 10% random sample of papers will be coded by a second reviewer for  
11  
12  
13 267 consistency. An Excel spreadsheet will be used for recording the CMO configurations from  
14  
15 268 each article. Our experience of undertaking realist reviews suggests that individual articles  
16  
17  
18 269 are unlikely to provide us with fully formed CMO configurations or to even contain  
19  
20 270 information about all three elements of context, mechanism, and outcome (20). Therefore,  
21  
22  
23 271 we will also record CMO fragments in the Excel spreadsheet. Once this is complete, the list of  
24  
25 272 CMO configurations will be refined to combine those that are similar. Narrative summaries of  
26  
27  
28 273 each of the substantive theories identified will be written and we will compare the CMO  
29  
30 274 configurations with the substantive theories, using the substantive theories to fill in any  
31  
32  
33 275 remaining gaps in the CMO configurations. The resulting CMO configurations, explaining both  
34  
35 276 (1) what supports and constrains implementation of multifactorial falls risk assessment and  
36  
37 277 tailored multifactorial falls prevention interventions in acute hospitals, and (2) how, why, in  
38  
39  
40 278 what contexts, and for whom tailored multifactorial falls prevention interventions lead to a  
41  
42 279 reduction in patients' falls risk, will combine to provide an initial programme theory.

44 280 A particular risk for realist reviews is that they can easily become unwieldy (19). We will  
45  
46  
47 281 mitigate against this by taking guidance from our lay researchers and Study Steering  
48  
49  
50 282 Committee regarding the CMO configurations that should be taken forward for testing in  
51  
52 283 Phase 2 of the review. We will first identify a sub-set of possible CMO configurations, based  
53  
54 284 on the feasibility of testing them, undertaking initial scoping searches to gauge the extent of  
55  
56  
57 285 the available literature, and based on their potential for informing practice (e.g. if a CMO  
58  
59 286 configuration contains contextual factors that constrain the conduct of falls risk assessment  
60



1  
2  
3 287 that are not amenable to change, it will not be taken forward for testing). We will discuss the  
4  
5  
6 288 remaining sub-set of CMO configurations with our lay researchers and our Study Steering  
7  
8 289 Committee and ask them to rank them in order of priority; those CMO configurations which  
9  
10 290 have the highest ranking across both groups will be taken forward to the next stage.  
11  
12

13 291

## 15 292 **Phase 2: Theory testing**

### 17 293 ***Search strategy***

18 294 Searching will be purposive and iterative, driven by the prioritised CMO configurations, in  
19  
20 295 order to identify empirical studies relevant to testing of the initial programme theory (19).  
21  
22 296 Searches will be designed by an information specialist (JW) with input from the review team.  
23  
24 297 It will be peer reviewed by a second information specialist. Health and multidisciplinary  
25  
26 298 databases to be searched include:  
27  
28  
29

- 30 299 • Ovid Medline and Medline In-Process & Other Non-Indexed Citations (1946 – present)
- 31
- 32 300 • EBSCO CINAHL (1981 – present)
- 33
- 34 301 • Ovid EMBASE (1947 – present)
- 35
- 36 302 • Web of Science Core Collection (1900 – present)
- 37
- 38 303 • ProQuest Applied Social Sciences Index & Abstracts (1987 – present)
- 39

40 304 An initial scoping search suggests there is limited empirical evidence from the hospital setting,  
41  
42 305 with existing research tending to focus on the community setting. However, realist reviews  
43  
44 306 offer particular benefits when considering interventions where there is limited primary  
45  
46 307 research because the key unit of analysis is the intervention mechanism; this means that  
47  
48 308 literature concerning the same intervention in another setting or other interventions that  
49  
50 309 have the same underlying mechanism are deemed relevant, so a wider breadth of evidence  
51  
52 310 is available (19, 24). Consequently, while initial searches will be limited to the hospital setting,  
53  
54  
55  
56  
57  
58  
59  
60

1  
2  
3 311 where there is an absence of literature searches will be broadened out to include literature  
4  
5  
6 312 from the community setting and care homes. We may also broaden our search to include  
7  
8 313 literature concerning other interventions that are based on the same mechanisms as those  
9  
10 314 within the initial programme theory. Search techniques will include structured literature  
11  
12  
13 315 searching of academic databases listed, and also complementary searching such as citation  
14  
15 316 searching and other CLUSTER searching techniques (25) that can identify relevant studies  
16  
17  
18 317 through links in citation networks or through a focus on specific authors or projects. Grey  
19  
20 318 literature searching (for example websites of professional organisations) will be undertaken  
21  
22  
23 319 where it likely to uncover literature relevant to the programme theories under investigation.  
24

25 320

### 27 321 ***Screening process***

29  
30 322 As in Phase 1, a 'liberal accelerated' approach to screening will be taken. Relevance of each  
31  
32 323 study to testing the initial programme theory will be assessed pragmatically against key  
33  
34 324 inclusion criteria concerned with the context (acute hospitals) and the intervention (falls risk  
35  
36 325 assessment and/or falls prevention interventions). Priority will be given to those studies that  
37  
38  
39 326 meet all inclusion criteria but we will also include studies which match the intervention  
40  
41 327 criteria but not the context criteria (e.g. studies about falls risk assessment in care homes)  
42  
43  
44 328 and studies which match the context criteria and are concerned with interventions that have  
45  
46 329 the same underlying mechanism (e.g. studies about pressure ulcer risk assessment in acute  
47  
48  
49 330 hospitals). All study designs will be included, acknowledging that different study designs make  
50  
51 331 different contributions to theory testing; for example, randomised controlled trials (RCTs)  
52  
53 332 provide information on outcome patterns and may provide some pointers to likely contextual  
54  
55 333 differences, but they seldom provide information about mechanisms, information which is  
56  
57  
58 334 more likely to be found in qualitative studies. A PRISMA flow chart detailing the review  
59  
60

1  
2  
3 335 decision process for Phase 2 will be developed.  
4  
5  
6 336

7  
8 337 ***Appraisal and analysis***  
9

10 338 Studies deemed to be relevant will be appraised using the Mixed Methods Appraisal Tool (26).

11  
12  
13 339 However, we will not exclude studies based on this appraisal. Additionally, following the

14  
15 340 realist approach, in describing the studies, we will reflect only on the quality of those

16  
17 341 elements of the studies from which *evidential fragments* for theory testing are drawn (27).

18  
19  
20 342 For example, in a mixed methods study, questionable analyses of falls data are not of concern

21  
22 343 if what we are drawing on are the well conducted qualitative elements of the study. As in

23  
24  
25 344 Phase 1, included studies will be imported into NVivo and coded as context, mechanism, and

26  
27 345 outcome, capturing all reported outcomes.

28  
29  
30 346 Guidelines for systematic reviews suggest that, in addition to assessing risk of bias in

31  
32 347 individual studies, an assessment of the risk of bias across studies – such as publication bias

33  
34  
35 348 and selective reporting within studies – should be undertaken (28). However, this assumes a

36  
37 349 traditional systematic review that relies on quantitative studies and uses approaches that are

38  
39  
40 350 not easily applicable when using the wide range of study designs that realist reviews typically

41  
42 351 incorporate.  
43  
44  
45 352

46  
47 353 **Phase 3: Theory refinement**  
48

49  
50 354 Coded data for each individual study will be compared in turn with the initial programme

51  
52 355 theory to determine whether the findings support, refute, or suggest a revision or addition to

53  
54  
55 356 the CMO configurations. The resulting programme theory will be summarised in both

56  
57 357 diagrammatic and narrative form (29, 30).  
58

59 358 In reporting the review, the Realist And Meta-narrative Evidence Syntheses: Evolving  
60

1  
2  
3 359 Standards (RAMESES) publication standards will be followed (31). Any changes from this  
4  
5  
6 360 protocol will be reported and the rationale provided.  
7

8 361 For systematic reviews, it is recommended that the strength of the body of evidence is  
9  
10 362 assessed and reported (28), for example using the Grades of Recommendation, Assessment,  
11  
12  
13 363 Development and Evaluation (GRADE) approach (32) or GRADE-CERQual (Confidence in the  
14  
15 364 Evidence from Reviews of Qualitative research) (33). Approaches such as GRADE are not  
16  
17  
18 365 appropriate for a realist review, because they rely on hierarchies of evidence in making  
19  
20 366 assessments and treat inconsistency in effects across studies as a problem, whereas realist  
21  
22  
23 367 reviews accept that there may be 'nuggets of wisdom' in methodologically weak studies (27)  
24  
25 368 and expect variation in effects because of variation in programme contexts (34). GRADE-  
26  
27  
28 369 CERQual involves assessing each individual review finding based on the four components of  
29  
30 370 methodological limitations, coherence, adequacy of data, and relevance (33). It has been used  
31  
32  
33 371 for previous realist reviews (35, 36) and fits better with the realist approach, involving  
34  
35 372 consideration of the theoretical contributions of studies and encouraging reviewers to be  
36  
37  
38 373 sensitive to the importance of context (14). Therefore, we will use CERQual to assess each  
39  
40 374 CMO, rating confidence in each as either high, moderate, low, or very low. This will both  
41  
42  
43 375 support decision making of those who wish to use the findings of the review to inform their  
44  
45 376 practice and highlight areas where further primary research is needed.  
46

47 377

## 48 49 378 **ETHICS AND DISSEMINATION**

50  
51  
52 379 Ethical approval is not required for this review.  
53

54 380

55  
56  
57 381 This review will provide evidence that healthcare providers can use to inform their own  
58  
59 382 multifactorial falls risk assessment and prevention strategies, with the potential to reduce  
60

1  
2  
3 383 frequency of inpatient falls and thereby reduce the impact of both human suffering and  
4  
5 384 healthcare costs. Therefore, the results will be published in an academic journal that has a  
6  
7  
8 385 clinical readership. We will also present the findings at other venues where we will reach  
9  
10 386 clinical staff, including the Royal College of Nursing International Nursing Research  
11  
12  
13 387 Conference, local Falls Collaboratives, and Nursing, Midwifery and AHP Research conferences  
14  
15 388 at local Trusts. We will engage with the wider public via a project website, where links to  
16  
17  
18 389 publications will be provided, and social media, e.g. Twitter.  
19  
20  
21  
22

### 23 391 **Acknowledgements**

24  
25 392 This research is funded by the National Institute for Health Research (NIHR) Health Services  
26  
27 393 and Delivery Research (HS&DR) Programme (project number NIHR129488). The views and  
28  
29 394 opinions expressed are those of the author and do not necessarily reflect those of the HS&DR  
30  
31  
32 395 Programme, NIHR, NHS or the Department of Health.  
33  
34  
35  
36

### 37 397 **Author Contributions**

38  
39  
40 398 RR is Principal Investigator and guarantor for the review. She conceived, designed, and  
41  
42 399 secured funding for the review in collaboration with JW, NA, FH, DD, HS, NH, PG, SW, CT, and  
43  
44 400 DW. All authors provided input into various aspects of the design of the review and revised  
45  
46 401 drafts of the protocol. RR led the writing of this protocol manuscript. All authors read and  
47  
48  
49 402 approved the final manuscript.  
50  
51  
52  
53

### 54 404 **Funding statement**

55  
56  
57 405 This research is funded by the National Institute for Health Research (NIHR) Health Services  
58  
59 406 and Delivery Research (HS&DR) Programme (project number NIHR129488).  
60

1  
2  
3 407  
4  
5  
6 408**Competing interests statement**7  
8 409 The authors declare that they have no competing interests.  
9  
10  
11 410**Additional files**12  
13 411  
14  
15 412 Additional file 1: Checklist of PRISMA-P reporting standards  
16  
17  
18 413 Additional file 2: Practitioner theories example search strategy  
19  
20 414 Additional file 3: Academic theories example search strategy  
21  
22  
23 415**References**

- 24
- 
- 25 416
- 
- 26
- 
- 27 417 1. Becker C, Woo J, Todd C. Falls. In: Michel J-P, Beattie BL, Martin FC, Walston JD, editors.
- 
- 28 418 Oxford Textbook for Geriatric Medicine. 3rd ed. Oxford: Oxford University Press; 2017.
- 
- 29 419 2. NHS Improvement. The incidence and costs of inpatient falls in hospitals. London: NHS
- 
- 30 420 Improvement; 2017.
- 
- 31 421 3. Oliver D, Healey F, Haines TP. Preventing Falls and Fall-Related Injuries in Hospitals. Clin
- 
- 32 422 Geriatr Med. 2010;26(4):645-92.
- 
- 33 423 4. Murray GR, Cameron ID, Cumming RG. The Consequences of Falls in Acute and Subacute
- 
- 34 424 Hospitals in Australia That Cause Proximal Femoral Fractures. J Am Geriatr Soc. 2007;55(4):577-82.
- 
- 35 425 5. Royal College of Physicians. National Audit of Inpatient Falls: audit report 2017. London:
- 
- 36 426 Royal College of Physicians; 2017.
- 
- 37 427 6. England PH. Falls and fracture consensus statement: Supporting commissioning for
- 
- 38 428 prevention. 2017.
- 
- 39 429 7. The Health Foundation. Closing the gap through clinical communities: The FallSafe project.
- 
- 40 430 London: The Health Foundation; 2012.
- 
- 41 431 8. Oliver D, Killick S, Even T, Willmott M. Do falls and falls-injuries in hospital indicate negligent
- 
- 42 432 care—and how big is the risk? A retrospective analysis of the NHS Litigation Authority Database of
- 
- 43 433 clinical negligence claims, resulting from falls in hospitals in England 1995 to 2006. Quality and
- 
- 44 434 Safety in Health Care. 2008;17(6):431-6.
- 
- 45 435 9. Oliver D, Britton M, Seed P, Martin FC, Hopper AH. Development and evaluation of evidence
- 
- 46 436 based risk assessment tool (STRATIFY) to predict which elderly inpatients will fall: case-control and
- 
- 47 437 cohort studies. BMJ. 1997;315(7115):1049-53.
- 
- 48 438 10. Oliver D. Falls risk-prediction tools for hospital inpatients. Time to put them to bed? Age
- 
- 49 439 Ageing. 2008;37(3):248-50.
- 
- 50 440 11. National Institute for Health and Clinical Excellence. Falls in older people: assessing risk and
- 
- 51 441 prevention: clinical guideline. London: NICE; 2013.
- 
- 52 442 12. Royal College of Physicians. National Audit of Inpatient Falls (NAIF): audit report 2020.
- 
- 53 443 London: Royal College of Physicians; 2020.
- 
- 54 444 13. Carroll DL, Dykes PC, Hurley AC. Patients' perspectives of falling while in an acute care
- 
- 55 445 hospital and suggestions for prevention. Appl Nurs Res. 2010;23(4):238-41.
- 
- 56
- 
- 57
- 
- 58
- 
- 59
- 
- 60

14. Haines TP, Lee D-CA, O'Connell B, McDermott F, Hoffmann T. Why do hospitalized older adults take risks that may lead to falls? *Health Expectations*. 2015;18(2):233-49.
15. Radecki B, Reynolds S, Kara A. Inpatient fall prevention from the patient's perspective: A qualitative study. *Appl Nurs Res*. 2018;43:114-9.
16. Shuman C, Liu J, Montie M, Galinato JG, Todd MA, Hegstad M, et al. Patient perceptions and experiences with falls during hospitalization and after discharge. *Appl Nurs Res*. 2016;31:79-85.
17. Twibell RS, Siela D, Sproat T, Coers G. Perceptions Related to Falls and Fall Prevention Among Hospitalized Adults. *Am J Crit Care*. 2015;24(5):e78-e85.
18. Pawson R. Evidence-based policy: A realist perspective. London: SAGE; 2006.
19. Pawson R, Greenhalgh T, Harvey G, Walshe K. Realist review – a new method of systematic review designed for complex policy interventions. *J Health Serv Res Policy*. 2005;10(suppl 1):21-34.
20. Randell R, Honey S, Alvarado N, Pearman A, Greenhalgh J, Long A, et al. Embedding robotic surgery into routine practice and impacts on communication and decision making: a review of the experience of surgical teams. *Cognition, Technology & Work*. 2016;18(2):423-37.
21. Khangura S, Konnyu K, Cushman R, Grimshaw J, Moher D. Evidence summaries: the evolution of a rapid review approach. *Systematic reviews*. 2012;1(1):1-9.
22. Ganann R, Ciliska D, Thomas H. Expediting systematic reviews: methods and implications of rapid reviews. *Implementation Science*. 2010;5(1):56.
23. Keen J, Greenhalgh J, Randell R, Gardner P, Waring J, Longo R, et al. Networked information technologies and patient safety: a protocol for a realist synthesis. *Systematic Reviews*. 2019;8(1):307.
24. Wong G. Data gathering in realist reviews: Looking for needles in haystacks. In: Emmel N, Greenhalgh J, Manzano A, Monaghan M, Dalkin S, editors. *Doing realist research*. London: Sage; 2018. p. 131-45.
25. Booth A, Harris J, Croot E, Springett J, Campbell F, Wilkins E. Towards a methodology for cluster searching to provide conceptual and contextual "richness" for systematic reviews of complex interventions: case study (CLUSTER). *BMC Med Res Methodol*. 2013;13(1):118.
26. Hong QN, FÀBregues S, Bartlett G, Boardman F, Cargo M, Dagenais P, et al. The Mixed Methods Appraisal Tool (MMAT) version 2018 for information professionals and researchers. *Education for Information*. 2018(Preprint):1-7.
27. Pawson R. Digging for Nuggets: How 'Bad' Research Can Yield 'Good' Evidence. *International Journal of Social Research Methodology*. 2006;9(2):127-42.
28. Moher D, Liberati A, Tetzlaff J, Altman DG, The PG. Preferred Reporting Items for Systematic Reviews and Meta-Analyses: The PRISMA Statement. *PLoS Med*. 2009;6(7):e1000097.
29. Davidoff F, Dixon-Woods M, Leviton L, Michie S. Demystifying theory and its use in improvement. *BMJ Quality & Safety*. 2015.
30. Funnell SC, Rogers PJ. Purposeful program theory: effective use of theories of change and logic models. San Francisco: John Wiley & Sons; 2011.
31. Wong G, Greenhalgh T, Westhorp G, Buckingham J, Pawson R. RAMESES publication standards: realist syntheses. *BMC Med*. 2013;11(1):21.
32. Atkins D, Best D, Briss PA, Eccles M, Falck-Ytter Y, Flottorp S, et al. Grading quality of evidence and strength of recommendations. *BMJ (Clinical research ed)*. 2004;328(7454):1490-.
33. Lewin S, Booth A, Glenton C, Munthe-Kaas H, Rashidian A, Wainwright M, et al. Applying GRADE-CERQual to qualitative evidence synthesis findings: introduction to the series. *Implementation Science*. 2018;13(1):2.
34. Pawson R. Evidence-based Policy: In Search of a Method. *Evaluation*. 2002;8(2):157-81.
35. Charles JM, Rycroft-Malone J, Aslam Rh, Hendry M, Pasterfield D, Whitaker R. Reducing repeat pregnancies in adolescence: applying realist principles as part of a mixed-methods systematic review to explore what works, for whom, how and under what circumstances. *BMC Pregnancy Childbirth*. 2016;16(1):271.

- 1  
2  
3 496 36. Rivas C, Vigurs C, Cameron J, Yeo L. A realist review of which advocacy interventions work  
4 497 for which abused women under what circumstances. Cochrane Database of Systematic Reviews.  
5 498 2019(6).  
6  
7 499  
8  
9  
10  
11  
12  
13  
14  
15  
16  
17  
18  
19  
20  
21  
22  
23  
24  
25  
26  
27  
28  
29  
30  
31  
32  
33  
34  
35  
36  
37  
38  
39  
40  
41  
42  
43  
44  
45  
46  
47  
48  
49  
50  
51  
52  
53  
54  
55  
56  
57  
58  
59  
60

For peer review only



## PRISMA-P 2015 Checklist

What supports and constrains the implementation of multifactorial falls risk assessment and tailored multifactorial falls prevention interventions in acute hospitals? Protocol for a realist review (Randell et al.)

| Section/topic                     | #  | Checklist item                                                                                                                                                                                  | Information reported                |                                     | Line number(s) |
|-----------------------------------|----|-------------------------------------------------------------------------------------------------------------------------------------------------------------------------------------------------|-------------------------------------|-------------------------------------|----------------|
|                                   |    |                                                                                                                                                                                                 | Yes                                 | No                                  |                |
| <b>ADMINISTRATIVE INFORMATION</b> |    |                                                                                                                                                                                                 |                                     |                                     |                |
| <b>Title</b>                      |    |                                                                                                                                                                                                 |                                     |                                     |                |
| Identification                    | 1a | Identify the report as a protocol of a systematic review                                                                                                                                        | <input checked="" type="checkbox"/> | <input type="checkbox"/>            | 1              |
| Update                            | 1b | If the protocol is for an update of a previous systematic review, identify as such                                                                                                              | <input type="checkbox"/>            | <input checked="" type="checkbox"/> | Not applicable |
| <b>Registration</b>               | 2  | If registered, provide the name of the registry (e.g., PROSPERO) and registration number in the Abstract                                                                                        | <input checked="" type="checkbox"/> | <input type="checkbox"/>            | 70             |
| <b>Authors</b>                    |    |                                                                                                                                                                                                 |                                     |                                     |                |
| Contact                           | 3a | Provide name, institutional affiliation, and e-mail address of all protocol authors; provide physical mailing address of corresponding author                                                   | <input checked="" type="checkbox"/> | <input type="checkbox"/>            | 5-28           |
| Contributions                     | 3b | Describe contributions of protocol authors and identify the guarantor of the review                                                                                                             | <input checked="" type="checkbox"/> | <input type="checkbox"/>            | 399-403        |
| <b>Amendments</b>                 | 4  | If the protocol represents an amendment of a previously completed or published protocol, identify as such and list changes; otherwise, state plan for documenting important protocol amendments | <input checked="" type="checkbox"/> | <input type="checkbox"/>            | 360-361        |
| <b>Support</b>                    |    |                                                                                                                                                                                                 |                                     |                                     |                |
| Sources                           | 5a | Indicate sources of financial or other support for the review                                                                                                                                   | <input checked="" type="checkbox"/> | <input type="checkbox"/>            | 406-407        |
| Sponsor                           | 5b | Provide name for the review funder and/or sponsor                                                                                                                                               | <input checked="" type="checkbox"/> | <input type="checkbox"/>            | 406-407        |
| Role of sponsor/funder            | 5c | Describe roles of funder(s), sponsor(s), and/or institution(s), if any, in developing the protocol                                                                                              | <input checked="" type="checkbox"/> | <input type="checkbox"/>            | 394-396        |
| <b>INTRODUCTION</b>               |    |                                                                                                                                                                                                 |                                     |                                     |                |
| <b>Rationale</b>                  | 6  | Describe the rationale for the review in the context of what is already known                                                                                                                   | <input checked="" type="checkbox"/> | <input type="checkbox"/>            | 96-156         |
| <b>Objectives</b>                 | 7  | Provide an explicit statement of the question(s) the review will address with reference to participants, interventions, comparators, and outcomes (PICO)                                        | <input checked="" type="checkbox"/> | <input type="checkbox"/>            | 157-161        |

| Section/topic                             | #   | Checklist item                                                                                                                                                                                                                              | Information reported                |                                     | Line number(s)                     |
|-------------------------------------------|-----|---------------------------------------------------------------------------------------------------------------------------------------------------------------------------------------------------------------------------------------------|-------------------------------------|-------------------------------------|------------------------------------|
|                                           |     |                                                                                                                                                                                                                                             | Yes                                 | No                                  |                                    |
| <b>METHODS</b>                            |     |                                                                                                                                                                                                                                             |                                     |                                     |                                    |
| <b>Eligibility criteria</b>               | 8   | Specify the study characteristics (e.g., PICO, study design, setting, time frame) and report characteristics (e.g., years considered, language, publication status) to be used as criteria for eligibility for the review                   | <input checked="" type="checkbox"/> | <input type="checkbox"/>            | 229-260, 323-335                   |
| <b>Information sources</b>                | 9   | Describe all intended information sources (e.g., electronic databases, contact with study authors, trial registers, or other grey literature sources) with planned dates of coverage                                                        | <input checked="" type="checkbox"/> | <input type="checkbox"/>            | 191-208, 298-320                   |
| <b>Search strategy</b>                    | 10  | Present draft of search strategy to be used for at least one electronic database, including planned limits, such that it could be repeated                                                                                                  | <input checked="" type="checkbox"/> | <input type="checkbox"/>            | Provided as additional files       |
| <b>STUDY RECORDS</b>                      |     |                                                                                                                                                                                                                                             |                                     |                                     |                                    |
| Data management                           | 11a | Describe the mechanism(s) that will be used to manage records and data throughout the review                                                                                                                                                | <input checked="" type="checkbox"/> | <input type="checkbox"/>            | 217-219, 264-265, 268-272, 344-346 |
| Selection process                         | 11b | State the process that will be used for selecting studies (e.g., two independent reviewers) through each phase of the review (i.e., screening, eligibility, and inclusion in meta-analysis)                                                 | <input checked="" type="checkbox"/> | <input type="checkbox"/>            | 222-224, 323                       |
| Data collection process                   | 11c | Describe planned method of extracting data from reports (e.g., piloting forms, done independently, in duplicate), any processes for obtaining and confirming data from investigators                                                        | <input checked="" type="checkbox"/> | <input type="checkbox"/>            | 264-269, 344-346                   |
| <b>Data items</b>                         | 12  | List and define all variables for which data will be sought (e.g., PICO items, funding sources), any pre-planned data assumptions and simplifications                                                                                       | <input checked="" type="checkbox"/> | <input type="checkbox"/>            | 264-267, 344-346                   |
| <b>Outcomes and prioritization</b>        | 13  | List and define all outcomes for which data will be sought, including prioritization of main and additional outcomes, with rationale                                                                                                        | <input checked="" type="checkbox"/> | <input type="checkbox"/>            | 265-267, 344-346                   |
| <b>Risk of bias in individual studies</b> | 14  | Describe anticipated methods for assessing risk of bias of individual studies, including whether this will be done at the outcome or study level, or both; state how this information will be used in data synthesis                        | <input checked="" type="checkbox"/> | <input type="checkbox"/>            | 339-344                            |
| <b>DATA</b>                               |     |                                                                                                                                                                                                                                             |                                     |                                     |                                    |
| <b>Synthesis</b>                          | 15a | Describe criteria under which study data will be quantitatively synthesized                                                                                                                                                                 | <input type="checkbox"/>            | <input checked="" type="checkbox"/> | Not appropriate for realist review |
|                                           | 15b | If data are appropriate for quantitative synthesis, describe planned summary measures, methods of handling data, and methods of combining data from studies, including any planned exploration of consistency (e.g., $I^2$ , Kendall's tau) | <input type="checkbox"/>            | <input checked="" type="checkbox"/> | Not appropriate for realist review |

| Section/topic                            | #   | Checklist item                                                                                                              | Information reported                |                                     | Line number(s)                     |
|------------------------------------------|-----|-----------------------------------------------------------------------------------------------------------------------------|-------------------------------------|-------------------------------------|------------------------------------|
|                                          |     |                                                                                                                             | Yes                                 | No                                  |                                    |
|                                          | 15c | Describe any proposed additional analyses (e.g., sensitivity or subgroup analyses, meta-regression)                         | <input type="checkbox"/>            | <input checked="" type="checkbox"/> | Not appropriate for realist review |
|                                          | 15d | If quantitative synthesis is not appropriate, describe the type of summary planned                                          | <input checked="" type="checkbox"/> | <input type="checkbox"/>            | 272-280, 355-358                   |
| <b>Meta-bias(es)</b>                     | 16  | Specify any planned assessment of meta-bias(es) (e.g., publication bias across studies, selective reporting within studies) | <input checked="" type="checkbox"/> | <input type="checkbox"/>            | 347-352                            |
| <b>Confidence in cumulative evidence</b> | 17  | Describe how the strength of the body of evidence will be assessed (e.g., GRADE)                                            | <input checked="" type="checkbox"/> | <input type="checkbox"/>            | 362-377                            |

1  
2  
3 **What supports and constrains the implementation of multifactorial falls risk**  
4 **assessment and tailored multifactorial falls prevention interventions in acute**  
5 **hospitals? Protocol for a realist review (Randell et al.)**  
6

7 **Additional file 2: Practitioner Theories Search Strategy Example**  
8

9 **Ovid MEDLINE(R) and Epub Ahead of Print, In-Process & Other Non-Indexed Citations**  
10 **and Daily <1946 to July 22, 2020>**  
11

- 12  
13 1 Accidental Falls/ or exp Hip Fractures/pc (25502)  
14 2 (fall or falls or faller\*).tw,kw. (147405)  
15 3 or/1-2 [falls] (155967)  
16 4 Risk Assessment/ (265290)  
17 5 risk assess\*.tw,kw. (69279)  
18 6 (fall\* adj3 (assess\* or screen\* or prevent\* or predict\*)).tw,kw. (10727)  
19 7 exp Accident Prevention/ (86820)  
20 8 or/4-7 [assessment or prevention] (391878)  
21 9 nursing time\*.jn. (39139)  
22 10 3 and 8 and 9 (26)  
23 11 nursing standard.jn. (35276)  
24 12 3 and 8 and 11 (33)  
25 13 health service\* journal.jn. (10933)  
26 14 3 and 8 and 13 (3)  
27 15 10 or 12 or 14 (62)  
28  
29  
30  
31  
32  
33  
34  
35  
36  
37  
38  
39  
40  
41  
42  
43  
44  
45  
46  
47  
48  
49  
50  
51  
52  
53  
54  
55  
56  
57  
58  
59  
60

1  
2  
3 **What supports and constrains the implementation of multifactorial falls risk**  
4 **assessment and tailored multifactorial falls prevention interventions in acute**  
5 **hospitals? Protocol for a realist review (Randell et al.)**  
6

7 **Additional file 2: Academic Theories Search Strategy Example**  
8

9 **Ovid MEDLINE(R) and Epub Ahead of Print, In-Process & Other Non-Indexed Citations**  
10 **and Daily <1946 to July 21, 2020>**  
11

12  
13 1 Accidental Falls/ or exp Hip Fractures/pc (25500)  
14 2 (fall or falls or faller\*).tw,kw. (147448)  
15 3 or/1-2 [falls] (156010)  
16 4 Risk Assessment/ (265251)  
17 5 risk assess\*.tw,kw. (69315)  
18 6 (fall\* adj3 (assess\* or screen\* or prevent\* or predict\*)).tw,kw. (10733)  
19 7 exp Accident Prevention/ (86806)  
20 8 or/4-7 [assessment or prevention] (391875)  
21 9 Hospitalization/ (107412)  
22 10 Subacute Care/ (1049)  
23 11 Hospital Units/ (10146)  
24 12 exp Hospitals/ (274581)  
25 13 Rehabilitation Centers/ (8183)  
26 14 Inpatients/ (21949)  
27 15 ((acute or sub-acute or subacute) adj3 (care or ward?)).tw,kw. (31737)  
28 16 ((rehabilitation or geriatric) adj (ward? or unit? or department?)).tw,kw. (6423)  
29 17 inpatient?.tw,kw. (107879)  
30 18 hospital\*.tw,kw. (1294309)  
31 19 or/9-18 [hospital] (1485504)  
32 20 3 and 8 and 19 [Fall assmt & prevention in hospitals] (3313)  
33 21 meta-analysis/ or "systematic review"/ (194072)  
34 22 (Literature review\* or (systematic adj2 review\*) or (narrative adj2 review\*) or (critical  
35 adj2 review\*) or scoping review\* or synthesis or meta-analys\* or "meta analysis" or (realist  
36 adj2 review\*)).ti. (551543)  
37 23 ("Search filter\*" or "search strateg\*" or "literature search\*").ab. (66610)  
38 24 or/21-23 [Systematic reviews] (635237)  
39 25 20 and 24 (139)  
40  
41  
42  
43  
44  
45  
46  
47  
48  
49  
50  
51  
52  
53  
54  
55  
56  
57  
58  
59  
60

# BMJ Open

## What supports and constrains the implementation of multifactorial falls risk assessment and tailored multifactorial falls prevention interventions in acute hospitals? Protocol for a realist review

|                                 |                                                                                                                                                                                                                                                                                                                                                                                                                                                                                                                                                                                                                                                                                                                                                                                                                                                                                                    |
|---------------------------------|----------------------------------------------------------------------------------------------------------------------------------------------------------------------------------------------------------------------------------------------------------------------------------------------------------------------------------------------------------------------------------------------------------------------------------------------------------------------------------------------------------------------------------------------------------------------------------------------------------------------------------------------------------------------------------------------------------------------------------------------------------------------------------------------------------------------------------------------------------------------------------------------------|
| Journal:                        | <i>BMJ Open</i>                                                                                                                                                                                                                                                                                                                                                                                                                                                                                                                                                                                                                                                                                                                                                                                                                                                                                    |
| Manuscript ID                   | bmjopen-2021-049765.R1                                                                                                                                                                                                                                                                                                                                                                                                                                                                                                                                                                                                                                                                                                                                                                                                                                                                             |
| Article Type:                   | Protocol                                                                                                                                                                                                                                                                                                                                                                                                                                                                                                                                                                                                                                                                                                                                                                                                                                                                                           |
| Date Submitted by the Author:   | 05-Jul-2021                                                                                                                                                                                                                                                                                                                                                                                                                                                                                                                                                                                                                                                                                                                                                                                                                                                                                        |
| Complete List of Authors:       | Randell, Rebecca; University of Bradford, Faculty of Health Studies; Wolfson Centre for Applied Health Research<br>Wright, Judy; University of Leeds<br>Alvarado, Natasha; University of Bradford; Wolfson Institute for Applied Health Research<br>Healey, Frances ; NHS Improvement<br>Dowding, Dawn; The University of Manchester<br>Smith, Heather; Leeds Teaching Hospitals NHS Trust, Medicines Management & Pharmacy Services<br>Hardiker, Nick; University of Huddersfield<br>Gardner, Peter; University of Bradford; Wolfson Centre for Applied Health Research<br>Ward, Sue; Manchester University NHS Foundation Trust<br>Todd, Chris; The University of Manchester<br>Zaman, Hadar; University of Bradford<br>McVey, Lynn; University of Bradford; Wolfson Centre for Applied Health Research<br>Davey, Christopher; University of Bradford<br>Woodcock, David; University of Bradford |
| <b>Primary Subject Heading</b>: | Geriatric medicine                                                                                                                                                                                                                                                                                                                                                                                                                                                                                                                                                                                                                                                                                                                                                                                                                                                                                 |
| Secondary Subject Heading:      | Health services research, Nursing                                                                                                                                                                                                                                                                                                                                                                                                                                                                                                                                                                                                                                                                                                                                                                                                                                                                  |
| Keywords:                       | GERIATRIC MEDICINE, Health & safety < HEALTH SERVICES ADMINISTRATION & MANAGEMENT, Protocols & guidelines < HEALTH SERVICES ADMINISTRATION & MANAGEMENT, Quality in health care < HEALTH SERVICES ADMINISTRATION & MANAGEMENT, Risk management < HEALTH SERVICES ADMINISTRATION & MANAGEMENT                                                                                                                                                                                                                                                                                                                                                                                                                                                                                                                                                                                                       |
|                                 |                                                                                                                                                                                                                                                                                                                                                                                                                                                                                                                                                                                                                                                                                                                                                                                                                                                                                                    |

SCHOLARONE™  
Manuscripts

1  
2  
3  
4  
5  
6  
7  
8  
9  
10  
11  
12  
13  
14  
15  
16  
17  
18  
19  
20  
21  
22  
23  
24  
25  
26  
27  
28  
29  
30  
31  
32  
33  
34  
35  
36  
37  
38  
39  
40  
41  
42  
43  
44  
45  
46  
47  
48  
49  
50  
51  
52  
53  
54  
55  
56  
57  
58  
59  
60



I, the Submitting Author has the right to grant and does grant on behalf of all authors of the Work (as defined in the below author licence), an exclusive licence and/or a non-exclusive licence for contributions from authors who are: i) UK Crown employees; ii) where BMJ has agreed a CC-BY licence shall apply, and/or iii) in accordance with the terms applicable for US Federal Government officers or employees acting as part of their official duties; on a worldwide, perpetual, irrevocable, royalty-free basis to BMJ Publishing Group Ltd ("BMJ") its licensees and where the relevant Journal is co-owned by BMJ to the co-owners of the Journal, to publish the Work in this journal and any other BMJ products and to exploit all rights, as set out in our [licence](#).

The Submitting Author accepts and understands that any supply made under these terms is made by BMJ to the Submitting Author unless you are acting as an employee on behalf of your employer or a postgraduate student of an affiliated institution which is paying any applicable article publishing charge ("APC") for Open Access articles. Where the Submitting Author wishes to make the Work available on an Open Access basis (and intends to pay the relevant APC), the terms of reuse of such Open Access shall be governed by a Creative Commons licence – details of these licences and which [Creative Commons](#) licence will apply to this Work are set out in our licence referred to above.

Other than as permitted in any relevant BMJ Author's Self Archiving Policies, I confirm this Work has not been accepted for publication elsewhere, is not being considered for publication elsewhere and does not duplicate material already published. I confirm all authors consent to publication of this Work and authorise the granting of this licence.



1  
2  
3 1 **What supports and constrains the implementation of multifactorial falls risk assessment**  
4  
5  
6 2 **and tailored multifactorial falls prevention interventions in acute hospitals? Protocol for a**  
7  
8 3 **realist review**  
9

10  
11 4  
12  
13 5 **Authors:**  
14

15 6 Corresponding author: Rebecca Randell, Faculty of Health Studies, University of Bradford,  
16  
17  
18 7 Bradford, BD7 1DP, UK r.randell@bradford.ac.uk  
19

20 8 Judy Wright, Leeds Institute of Health Sciences, University of Leeds, Leeds  
21  
22  
23 9 j.m.wright@leeds.ac.uk  
24

25 10 Natasha Alvarado, Faculty of Health Studies, University of Bradford, Bradford,  
26  
27  
28 11 n.alvarado@bradford.ac.uk  
29

30 12 Frances Healey, NHS England and NHS Improvement, London, frances.healey@nhs.net  
31

32 13 Dawn Dowding, Division of Nursing, Midwifery & Social Work, University of Manchester,  
33  
34  
35 14 Manchester, dawn.dowding@manchester.ac.uk  
36

37 15 Heather Smith, Leeds Teaching Hospitals NHS Trust, Leeds, heather.smith11@nhs.net  
38

39  
40 16 Nick Hardiker, University of Huddersfield, Huddersfield, n.hardiker@hud.ac.uk  
41

42 17 Peter Gardner, Faculty of Life Sciences, University of Bradford, Bradford,  
43  
44  
45 18 p.h.gardner@bradford.ac.uk  
46

47 19 Sue Ward, Manchester University NHS Foundation Trust, Manchester, sue.ward@mft.nhs.uk  
48

49 20 Chris Todd, Division of Nursing, Midwifery & Social Work, University of Manchester,  
50  
51  
52 21 Manchester, chris.todd@manchester.ac.uk  
53

54 22 Hadar Zaman, Faculty of Life Sciences, University of Bradford, Bradford,  
55  
56  
57 23 h.zaman4@bradford.ac.uk  
58  
59  
60

1  
2  
3 24 Lynn McVey, Faculty of Health Studies, University of Bradford, Bradford,  
4

5  
6 25 l.mvvey@bradford.ac.uk  
7

8 26 Chris Davey, Faculty of Life Sciences, University of Bradford, Bradford,  
9

10  
11 27 c.j.davey1@bradford.ac.uk  
12

13 28 David Woodcock, Lay researcher, dimwoody65@gmail.com  
14

15  
16 29  
17

18 30  
19  
20  
21  
22  
23  
24  
25  
26  
27  
28  
29  
30  
31  
32  
33  
34  
35  
36  
37  
38  
39  
40  
41  
42  
43  
44  
45  
46  
47  
48  
49  
50  
51  
52  
53  
54  
55  
56  
57  
58  
59  
60

For peer review only

1  
2  
3 31 I, the Submitting Author has the right to grant and does grant on behalf of all authors of the Work (as  
4 32 defined in the below author licence), an exclusive licence and/or a non-exclusive licence for  
5 33 contributions from authors who are: i) UK Crown employees; ii) where BMJ has agreed a CC-BY licence  
6 34 shall apply, and/or iii) in accordance with the terms applicable for US Federal Government officers or  
7 35 employees acting as part of their official duties; on a worldwide, perpetual, irrevocable, royalty-free  
8 36 basis to BMJ Publishing Group Ltd ("BMJ") its licensees and where the relevant Journal is co-owned  
9 37 by BMJ to the co-owners of the Journal, to publish the Work in BMJ Open and any other BMJ products  
10 38 and to exploit all rights, as set out in our licence.  
11  
12  
13  
14  
15  
16  
17  
18  
19

20 40 The Submitting Author accepts and understands that any supply made under these terms is made by  
21 41 BMJ to the Submitting Author unless you are acting as an employee on behalf of your employer or a  
22 42 postgraduate student of an affiliated institution which is paying any applicable article publishing charge  
23 43 ("APC") for Open Access articles. Where the Submitting Author wishes to make the Work available on  
24 44 an Open Access basis (and intends to pay the relevant APC), the terms of reuse of such Open Access  
25 45 shall be governed by a Creative Commons licence – details of these licences and which Creative  
26 46 Commons licence will apply to this Work are set out in our licence referred to above.  
27  
28  
29  
30  
31  
32  
33  
34  
35  
36  
37  
38  
39  
40  
41  
42  
43  
44  
45  
46  
47

1  
2  
3 **48 Abstract**  
4

5 **49 Introduction:** Falls are the most common type of safety incident reported by acute hospitals  
6  
7  
8 50 and can cause both physical (e.g. hip fractures) and non-physical harm (e.g. reduced  
9  
10 51 confidence) to patients. It is recommended that, in order to prevent falls in hospital, patients  
11  
12  
13 52 should receive a multifactorial falls risk assessment and be provided with a multifactorial  
14  
15 53 intervention, tailored to address the patient's identified individual risk factors. It is estimated  
16  
17 54 that such an approach could reduce the incidence of inpatient falls by 25-30% and reduce the  
18  
19 55 annual cost of falls by up to 25%. However, there is substantial unexplained variation between  
20  
21 56 hospitals in the number and type of assessments undertaken and interventions implemented.  
22  
23

24  
25 **57 Methods and analysis:** A realist review will be undertaken to construct and test programme  
26  
27 58 theories regarding (1) what supports and constrains the implementation of multifactorial falls  
28  
29 59 risk assessment and tailored multifactorial falls prevention interventions in acute hospitals;  
30  
31 60 and (2) how, why, in what contexts, and for whom tailored multifactorial falls prevention  
32  
33 61 interventions lead to a reduction in patients' falls risk. We will first identify stakeholders'  
34  
35 62 theories concerning these two topics, searching Medline (1946 – present) and Medline In-  
36  
37 63 Process & Other Non-Indexed Citations, Health Management Information Consortium (1983  
38  
39 64 – present), and CINAHL (1981 – present). We will then test these theories systematically, using  
40  
41 65 primary studies to determine whether empirical evidence supports, refutes, or suggests a  
42  
43 66 revision or addition to the identified theories.  
44  
45  
46  
47  
48

49 **67 Ethics and dissemination:** The study does not require ethical approval. The review will  
50  
51 68 provide evidence for how to implement multifactorial falls risk assessment and prevention  
52  
53 69 strategies in acute hospital settings. This will be disseminated to academic and clinical  
54  
55 70 audiences and will provide the basis for a future multi-site study through which the theories  
56  
57 71 will be further refined.  
58  
59  
60

1  
2  
3 72 **Systematic review registration:** PROSPERO CRD42020184458.  
4  
5

6 73

7  
8 74 **Keywords:** Realist review, falls, risk assessment, hospitals, implementation  
9

10 75

11  
12  
13 76 **Word count:** 3,456  
14

15 77

## 17 78 **ARTICLE SUMMARY**

### 19 79 **Strengths and limitations of this study**

- 20  
21  
22  
23 80 • The use of realist review will allow us to go beyond the question of whether tailored  
24  
25 81 multifactorial falls prevention interventions lead to a reduction in patients' falls risk,  
26  
27  
28 82 to answer questions of how, why, in what contexts, and for whom.
- 29  
30 83 • By integrating literature from other settings and concerning interventions with the  
31  
32 84 same mechanisms and using citation searching to identify clusters of related studies,  
33  
34  
35 85 we will ensure we have adequate evidence to provide confidence in our findings.
- 36  
37 86 • We will consult our lay researchers and Study Steering Committee to prioritise the  
38  
39 87 CMO configurations for testing to mitigate against the possibility of the review  
40  
41 88 becoming unwieldy.
- 42  
43 89 • Drawing on a broader range of literature will increase the time required for testing  
44  
45 90 each CMO configuration and may mean that we do not have time to test all the CMO  
46  
47  
48 91 configurations identified.  
49

50  
51  
52 92

## 53 93 **INTRODUCTION**

54  
55  
56  
57 94 Inpatient falls in acute hospitals are an international patient safety concern. Approximately  
58  
59 95 30-40% of reported safety incidents in acute hospitals are falls (1), and in England falls are the

1  
2  
3 96 most common type of safety incident reported in acute hospitals (2). Injuries occur in 15-50%  
4  
5  
6 97 of hospital falls and up to 10% of these are serious (1). The proportion of falls resulting in any  
7  
8 98 fracture ranges from 1% to 3%, with reports of hip fracture ranging from 1.1% to 2.0% (3).  
9  
10  
11 99 Outcomes for patients who acquire hip fractures in hospital are far worse than for those who  
12  
13 100 acquire them in the community, with significant differences in mortality, discharge to long-  
14  
15 101 term high-level nursing care facilities, and return to preadmission activity of daily living status  
16  
17  
18 102 (4).

19  
20 103 The human cost of falling also includes fear of falling again and associated loss of confidence  
21  
22  
23 104 (1, 5), loss of independence (6), and social isolation (2). It can result in slower recovery (5),  
24  
25 105 even when physical harm is minimal, and can have longer term consequences for the patient's  
26  
27  
28 106 health, as fear of falling may lead to restriction of activity and associated loss of muscle and  
29  
30 107 balance function, thereby increasing further the risk of falling (1). Falls can also be a cause of  
31  
32  
33 108 significant distress for families and staff (3, 5). Falls in hospital are a common cause of  
34  
35 109 complaints (7) and can be a source of litigation (8). Falls in hospital are also associated with  
36  
37  
38 110 increased length of stay and greater amounts of health resource use (3).

39  
40 111 The traditional approach to managing falls in acute hospitals was to complete a falls risk  
41  
42 112 prediction tool (such as STRATIFY (9)). Such tools typically stratify patients according to their  
43  
44  
45 113 perceived risk of falling (high, medium, low) with interventions targeting individuals at high  
46  
47  
48 114 risk. There are, however, issues with this approach to risk evaluation for falls, in particular the  
49  
50 115 issue of discrimination, where all patients on the unit are identified as high risk, and that  
51  
52 116 having a score provides reassurance that action is being taken when actually it is not (10).

53  
54 117 Given the limitations of risk prediction tools, in the United Kingdom, the National Institute  
55  
56  
57 118 for Health and Care Excellence (NICE) guideline on falls in older people states that falls risk  
58  
59 119 prediction tools should not be used and instead a multifactorial falls risk assessment should  
60

1  
2  
3 120 be undertaken (11). Rather than categorising a patient according to their perceived risk of  
4  
5 121 falling, this approach to assessment identifies individual risk factors for each patient which  
6  
7  
8 122 may make them at risk of falling and that can be treated, improved or managed during their  
9  
10 123 stay. This may include: cognitive impairment; continence problems; falls history, including  
11  
12  
13 124 causes and consequences (e.g. injury and fear of falling); footwear that is unsuitable or  
14  
15 125 missing; health problems that may increase their risk of falling; medication; postural  
16  
17  
18 126 instability, mobility problems and/or balance problems; syncope syndrome; and visual  
19  
20 127 impairment. The NICE guideline states that a multifactorial falls risk assessment should be  
21  
22  
23 128 undertaken for all inpatients 65 years or older and inpatients aged 50 to 64 years judged to  
24  
25 129 be at higher risk of falling due to an underlying condition. On the basis of this assessment, a  
26  
27  
28 130 multifactorial intervention should be provided, tailored to address the patient's identified  
29  
30 131 individual risk factors. It is estimated that such an approach could reduce the incidence of  
31  
32 132 inpatient falls by 25-30% and reduce the significant annual cost of falls – estimated at £630  
33  
34  
35 133 million – by up to 25% (2).

36  
37 134 Even though the NICE guideline has included these recommendations since 2013, there is  
38  
39  
40 135 substantial unexplained variation between National Health Service (NHS) hospitals in England  
41  
42 136 and Wales, in terms of the number and type of assessments and interventions undertaken  
43  
44  
45 137 (5). In assessment, 32% of healthcare providers are still using risk screening tools to identify  
46  
47 138 those at risk of falls (12). Improvement was found between 2015 and 2017 in the proportion  
48  
49  
50 139 of older patients receiving these assessment and interventions but for some of these  
51  
52 140 remained concerningly low. These include cognitive impairment assessment (58.5%), delirium  
53  
54 141 assessment (39.7%), medications assessment (47.8%), and vision assessment (46.2%). In  
55  
56  
57 142 interventions, there was improvement in the presence of interventions where required for  
58  
59 143 cognitive impairment and delirium, although rates remained low (43.7% and 48.7%)  
60

1  
2  
3 144 respectively), but no overall significant change in the presence of tailored continence care  
4  
5  
6 145 plans (66.9%) or mobility interventions (78.8%) for those patients who required them.  
7

8 146 Given this variation, there is a need to understand the contextual factors that support and  
9  
10 147 constrain the implementation of multifactorial falls risk assessment and tailored  
11  
12 148 multifactorial falls prevention interventions in an acute hospital setting, in order to improve  
13  
14 149 practice. However, even if tailored multifactorial falls prevention interventions are  
15  
16 150 implemented, contextual factors may constrain their use, so that they do not achieve the  
17  
18 151 desired impact. For example, several studies suggest patient adherence to inpatient falls  
19  
20 152 prevention strategies depends on a range of contextual factors including patient willingness  
21  
22 153 to ask for assistance, with some patients not wishing to 'bother' staff (13) or not accepting  
23  
24 154 that they are at risk of falling (14-17). Therefore, in this paper, we present the protocol for a  
25  
26 155 realist review that aims to determine:  
27  
28  
29  
30  
31

- 32 156 1. What supports and constrains the implementation of multifactorial falls risk assessment  
33  
34 157 and tailored multifactorial falls prevention interventions in acute hospitals; and  
35  
36 158 2. How, why, in what contexts, and for whom tailored multifactorial falls prevention  
37  
38 159 interventions lead to a reduction in patients' falls risk.  
39  
40  
41

42 160 This protocol has been written in accordance with PRISMA-P guidelines (Additional file 1).  
43  
44  
45 161

## 46 47 162 **METHODS AND ANALYSIS**

48  
49 163 We will undertake a realist review. Realist review is a literature review method that  
50  
51 164 represents a divergence from traditional systematic review methodology (18). It starts by  
52  
53 165 identifying stakeholders' theories and then uses empirical evidence to systematically evaluate  
54  
55 166 these, allowing us to compare how an intervention is intended to work with how it actually  
56  
57 167 works in practice. For realists, interventions do not produce outcomes. Rather, interventions  
58  
59  
60



1  
2  
3 168 offer resources; outcomes depend on how recipients respond to those resources, which will  
4  
5  
6 169 vary according to the context. Realist theories, referred to as Context-Mechanism-Outcome  
7  
8 170 (CMO) configurations, explain how different contexts trigger particular intervention  
9  
10  
11 171 mechanisms (the reasoning and responses of recipients to intervention resources) which, in  
12  
13 172 turn, give rise to a particular pattern of outcomes.

15 173 Realist approaches can be thought of as consisting of three phases: theory elicitation, theory  
16  
17  
18 174 testing, and theory refinement, and we use this structure to describe the process of the realist  
19  
20 175 review.  
21  
22

23 176

## 25 177 **Patient and Public Involvement**

27 178 The lay member of the project team (DW) contributed to the design of the study. He has  
28  
29  
30 179 recruited a group of lay researchers from different background (members of the public who  
31  
32  
33 180 will contribute to the conduct of this research) who will provide input into the review,  
34  
35 181 prioritising the theories to be tested in Phase 2 of the review. These people (and the lay  
36  
37  
38 182 member of the Study Steering Committee) will draw on their own lived experiences of falling  
39  
40 183 or of caring for someone who has fallen, as well as other life experiences, to ensure that the  
41  
42 184 theories reflect concerns of most importance for patients and carers.  
43  
44

45 185

## 47 186 **Phase 1: Theory elicitation**

### 49 187 ***Search strategy***

51  
52 188 Searches will be designed by an information specialist with expertise in realist reviews (JW)  
53  
54 189 and peer reviewed by a second information specialist. A combination of free text terms,  
55  
56  
57 190 synonyms and indexing terms will be used. The searches will not be limited by publication  
58  
59 191 date.  
60

1  
2  
3 192 The databases to be searched include:  
4

- 5  
6 193 • Ovid Medline (1946 – present) and Medline In-Process & Other Non-Indexed Citations  
7  
8 194 • Ovid Health Management Information Consortium (1983 – present)  
9  
10  
11 195 • EBSCO CINAHL (1981 – present)  
12

13 196 We will undertake the following searches:  
14

- 15  
16 197 • *Practitioner theories*: Programme theories are likely to be found in editorials, comments,  
17  
18 198 letters, and news articles (19), so searches will be undertaken, using a filter (set of search  
19  
20 199 terms) to limit the search to these publication types (see Additional File 2 for an example  
21  
22  
23 200 search strategy). In addition to searching the databases listed above, we will search  
24  
25 201 relevant professional journals and the websites of professional organisations. Given the  
26  
27  
28 202 range of professional groups potentially involved in falls risk assessment and prevention,  
29  
30 203 a set of professional journals will be selected covering all the relevant professional groups.  
31  
32 204 This is likely to include, for example, the Nursing Standard, the Pharmaceutical Journal,  
33  
34 205 Frontline (a professional journal for physiotherapists), and Optometry Today. Websites  
35  
36 206 for professional organisations, including the British Geriatrics Society, the Royal College  
37  
38 207 of Nursing, and the Royal Pharmaceutical Society, will be searched. Searches will also be  
39  
40 208 run on Google for reports of quality improvement projects, such as the FallSafe quality  
41  
42  
43 209 improvement project (7).  
44  
45  
46  
47 210 • *Academic theories*: The discussion sections of empirical studies often include the authors'  
48  
49 211 theories about why the intervention did or did not achieve the desired effect (20).  
50  
51 212 Therefore, studies of falls prevention interventions will be searched for, using existing  
52  
53 213 systematic reviews as a starting point. See Additional File 3 for an example search strategy.  
54  
55  
56  
57 214 • *Substantive theories*: We will review articles retrieved in the 'academic theories' search  
58  
59 215 for reference to substantive theory and, if necessary, we will undertake an additional

216 search for relevant substantive theories on risk assessment and guideline adherence.

217 The records identified in the searches will be saved and managed in an EndNote library.

218 Details of all search activities (databases, websites, date of search, number of records found,

219 search strategies) will be recorded in a timeline spreadsheet.

220

### 221 ***Screening process and inclusion/exclusion criteria***

222 A 'liberal accelerated' approach to screening will be taken, where one reviewer reviews all

223 records/full text papers and a second reviewer reviews records/full text papers excluded by

224 the first reviewer (21). This approach is less time and resource intensive than having two

225 reviewers review all records/full text papers while maximising inclusion, increasing the

226 number of records/full text papers retained in comparison to a single reviewer (22). Because

227 the purpose of this phase of the review is to identify and catalogue programme theories and

228 theory fragments, rather than to assess their validity, selection will be based on relevance to

229 the topic of the review (18, 19). The inclusion criteria for the 'practitioner theories' and

230 'academic theories' searches will be:

231

232 • Multifactorial/single factor falls risk assessment or falls risk prediction tools and/or  
233 multifactorial/single falls prevention interventions

234 • Adults/older people

235 • Acute hospital setting

236 • Include arguments about what supports or constrains implementation and/or in what  
237 contexts and for whom they can/should be used

238 • Published in the English language

239

1  
2  
3 240 Exclusion criteria will be:  
4  
5

6 241

7  
8 242 • Children and young people  
9

10 243 • Settings other than acute hospital  
11  
12

13 244 • Published in languages other than English  
14  
15

16 245

17  
18 246 We will include articles about single factor risk assessment tools on the basis that  
19

20 247 understanding what supports and constrains their use will inform our understanding of what  
21

22 248 supports and constrains use of multifactorial risk assessment tools. Similarly, we will include  
23

24 249 articles about single falls prevention interventions on the basis that understanding what  
25

26 250 supports and constrains the implementation and use of single interventions will inform our  
27

28 251 understanding of what supports and constrains the implementation and use of multifactorial  
29

30 252 interventions which contain those single interventions as a component. This is in line with the  
31

32 253 realist approach, which seeks to link the responses to an intervention to particular resources  
33

34 254 provided by the intervention. We will also include articles about falls risk prediction tools to  
35

36 255 understand how and in what contexts they continue to be used instead of multifactorial falls  
37

38 256 risk assessments.  
39

40 257 We will exclude articles published in languages other than English because the nature of  
41

42 258 realist review means that we would need to translate the full article, for which the project  
43

44 259 does not have adequate resources. This is in contrast to traditional systematic reviews where  
45

46 260 only defined data needs to be identified and translated (23).  
47

48 261 A PRISMA flow chart detailing the review decision process for Phase 1 will be developed.  
49

50 262

51 263 ***Analysis and synthesis***  
52  
53  
54  
55  
56  
57  
58  
59  
60

1  
2  
3 264 Included articles from the 'practitioner theories' and 'academic theories' searches will be  
4  
5  
6 265 imported into NVivo and coded as context, mechanism, and outcome. Outcomes will include,  
7  
8 266 for example, fall rates, but also any other outcomes reported, to capture both intended and  
9  
10  
11 267 unintended impacts. A 10% random sample of papers will be coded by a second reviewer for  
12  
13 268 consistency. An Excel spreadsheet will be used for recording the CMO configurations from  
14  
15 269 each article. Our experience of undertaking realist reviews suggests that individual articles  
16  
17  
18 270 are unlikely to provide us with fully formed CMO configurations or to even contain  
19  
20  
21 271 information about all three elements of context, mechanism, and outcome (20). Therefore,  
22  
23 272 alongside recording any complete CMO configurations that we identify, we will also record  
24  
25 273 CMO fragments in the Excel spreadsheet. Once this is complete, the list of CMO configurations  
26  
27  
28 274 will be refined to combine those that are similar. Narrative summaries of each of the  
29  
30 275 substantive theories identified will be written and we will compare the CMO configurations  
31  
32  
33 276 with the substantive theories, using the substantive theories to fill in any remaining gaps in  
34  
35 277 the CMO configurations. The resulting CMO configurations, explaining both (1) what supports  
36  
37 278 and constrains implementation of multifactorial falls risk assessment and tailored  
38  
39  
40 279 multifactorial falls prevention interventions in acute hospitals, and (2) how, why, in what  
41  
42  
43 280 contexts, and for whom tailored multifactorial falls prevention interventions lead to a  
44  
45 281 reduction in patients' falls risk, will combine to provide an initial programme theory.

46  
47 282 A particular risk for realist reviews is that they can easily become unwieldy (19). We will  
48  
49  
50 283 mitigate against this by taking guidance from our lay researchers and Study Steering  
51  
52 284 Committee regarding the CMO configurations that should be taken forward for testing in  
53  
54 285 Phase 2 of the review. We will first identify a sub-set of possible CMO configurations, based  
55  
56  
57 286 on the feasibility of testing them, undertaking initial scoping searches to gauge the extent of  
58  
59 287 the available literature, and based on their potential for informing practice (e.g. if a CMO  
60

1  
2  
3 288 configuration contains contextual factors that constrain the conduct of falls risk assessment  
4  
5  
6 289 that are not amenable to change, it will not be taken forward for testing). We will discuss the  
7  
8 290 remaining sub-set of CMO configurations with our lay researchers and our Study Steering  
9  
10 291 Committee, which brings together clinicians and academics with expertise including falls  
11  
12 292 prevention, risk assessment, patient safety, and implementation science. We will ask them to  
13  
14 293 rank the CMO configurations in order of priority; those which have the highest ranking across  
15  
16 294 both groups will be taken forward to the next stage.  
17  
18  
19  
20  
21 295

## 22 296 **Phase 2: Theory testing**

### 23 297 ***Search strategy***

24  
25  
26  
27 298 Searching will be purposive and iterative, driven by the prioritised CMO configurations, in  
28  
29 299 order to identify empirical studies relevant to testing of the initial programme theory (19).  
30  
31 300 Searches will be designed by an information specialist (JW) with input from the review team.  
32  
33 301 It will be peer reviewed by a second information specialist. Health and multidisciplinary  
34  
35 302 databases to be searched include:  
36  
37  
38  
39

- 40 303 • Ovid Medline and Medline In-Process & Other Non-Indexed Citations (1946 – present)
- 41  
42 304 • EBSCO CINAHL (1981 – present)
- 43  
44 305 • Ovid EMBASE (1947 – present)
- 45  
46 306 • Web of Science Core Collection (1900 – present)
- 47  
48 307 • ProQuest Applied Social Sciences Index & Abstracts (1987 – present)
- 49

50  
51 308 An initial scoping search suggests there is limited empirical evidence from the hospital setting,  
52  
53 309 with existing research tending to focus on the community setting. However, realist reviews  
54  
55 310 offer particular benefits when considering interventions where there is limited primary  
56  
57 311 research because the key unit of analysis is the intervention mechanism; this means that  
58  
59  
60

1  
2  
3 312 literature concerning the same intervention in another setting or other interventions that  
4  
5  
6 313 have the same underlying mechanism are deemed relevant, so a wider breadth of evidence  
7  
8 314 is available (19, 24). Consequently, while initial searches will be limited to the hospital setting,  
9  
10 315 where there is an absence of literature searches will be broadened out to include literature  
11  
12  
13 316 from the community setting and care homes. We may also broaden our search to include  
14  
15 317 literature concerning other interventions that are based on the same mechanisms as those  
16  
17 318 within the initial programme theory. Search techniques will include structured literature  
18  
19 319 searching of academic databases listed, and also complementary searching such as citation  
20  
21 320 searching and other CLUSTER searching techniques (25) that can identify relevant studies  
22  
23 321 through links in citation networks or through a focus on specific authors or projects. Grey  
24  
25 322 literature searching (for example websites of professional organisations) will be undertaken  
26  
27 323 where it likely to uncover literature relevant to the programme theories under investigation.  
28  
29  
30  
31  
32  
33  
34

324

### 325 ***Screening process***

326 As in Phase 1, a 'liberal accelerated' approach to screening will be taken. Relevance of each  
327 study to testing the initial programme theory will be assessed pragmatically against key  
328 inclusion criteria concerned with the context (acute hospitals) and the intervention (falls risk  
329 assessment and/or falls prevention interventions). Priority will be given to those studies that  
330 meet all inclusion criteria but we will also include studies which match the intervention  
331 criteria but not the context criteria (e.g. studies about falls risk assessment in care homes)  
332 and studies which match the context criteria and are concerned with interventions that have  
333 the same underlying mechanism (e.g. studies about pressure ulcer risk assessment in acute  
334 hospitals). All study designs will be included, acknowledging that different study designs make  
335 different contributions to theory testing; for example, randomised controlled trials (RCTs)

1  
2  
3 336 provide information on outcome patterns and may provide some pointers to likely contextual  
4  
5 337 differences, but they seldom provide information about mechanisms, information which is  
6  
7  
8 338 more likely to be found in qualitative studies. A PRISMA flow chart detailing the review  
9  
10 339 decision process for Phase 2 will be developed.  
11  
12

13 340

### 15 341 ***Appraisal and analysis***

17  
18 342 Studies deemed to be relevant will be appraised using the Mixed Methods Appraisal Tool (26).  
19  
20 343 However, we will not exclude studies based on this appraisal. Additionally, following the  
21  
22 344 realist approach, in describing the studies, we will reflect only on the quality of those  
23  
24 345 elements of the studies from which *evidential fragments* for theory testing are drawn (27).  
25  
26 346 For example, in a mixed methods study, questionable analyses of falls data are not of concern  
27  
28 347 if what we are drawing on are the well conducted qualitative elements of the study. As in  
29  
30 348 Phase 1, included studies will be imported into NVivo and coded as context, mechanism, and  
31  
32 349 outcome, capturing all reported outcomes.  
33  
34

35  
36 350 Guidelines for systematic reviews suggest that, in addition to assessing risk of bias in  
37  
38 351 individual studies, an assessment of the risk of bias across studies – such as publication bias  
39  
40 352 and selective reporting within studies – should be undertaken (28). However, this assumes a  
41  
42 353 traditional systematic review that relies on quantitative studies and uses approaches that are  
43  
44 354 not easily applicable when using the wide range of study designs that realist reviews typically  
45  
46 355 incorporate.  
47  
48  
49

50 356

### 52 357 **Phase 3: Theory refinement**

53  
54  
55 358 Coded data for each individual study will be compared in turn with the initial programme  
56  
57 359 theory to determine whether the findings support, refute, or suggest a revision or addition to  
58  
59  
60



1  
2  
3 360 the CMO configurations. The resulting programme theory will be summarised in both  
4  
5  
6 361 diagrammatic and narrative form (29, 30).  
7

8 362 In reporting the review, the Realist And Meta-narrative Evidence Syntheses: Evolving  
9  
10 363 Standards (RAMESES) publication standards will be followed (31). Any changes from this  
11  
12  
13 364 protocol will be reported and the rationale provided.  
14

15 365 For systematic reviews, it is recommended that the strength of the body of evidence is  
16  
17 366 assessed and reported (28), for example using the Grades of Recommendation, Assessment,  
18  
19  
20 367 Development and Evaluation (GRADE) approach (32) or GRADE-CERQual (Confidence in the  
21  
22  
23 368 Evidence from Reviews of Qualitative research) (33). Approaches such as GRADE are not  
24  
25 369 appropriate for a realist review, because they rely on hierarchies of evidence in making  
26  
27  
28 370 assessments and treat inconsistency in effects across studies as a problem, whereas realist  
29  
30 371 reviews accept that there may be 'nuggets of wisdom' in methodologically weak studies (27)  
31  
32  
33 372 and expect variation in effects because of variation in programme contexts (34). GRADE-  
34  
35 373 CERQual involves assessing each individual review finding based on the four components of  
36  
37 374 methodological limitations, coherence, adequacy of data, and relevance (33). It has been used  
38  
39  
40 375 for previous realist reviews (35, 36) and fits better with the realist approach, involving  
41  
42 376 consideration of the theoretical contributions of studies and encouraging reviewers to be  
43  
44  
45 377 sensitive to the importance of context (14). Therefore, we will use CERQual to assess each  
46  
47 378 CMO, rating confidence in each as either high, moderate, low, or very low. This will both  
48  
49  
50 379 support decision making of those who wish to use the findings of the review to inform their  
51  
52 380 practice and highlight areas where further primary research is needed.  
53

54 381

## 57 382 **ETHICS AND DISSEMINATION**

58  
59 383 Ethical approval is not required for this review.  
60

1  
2  
3 384  
4  
5  
6 385 This review will provide evidence that healthcare providers can use to inform their own  
7  
8 386 multifactorial falls risk assessment and prevention strategies, with the potential to reduce  
9  
10 387 frequency of inpatient falls and thereby reduce the impact of both human suffering and  
11  
12 388 healthcare costs. Therefore, the results will be published in an academic journal that has a  
13  
14  
15 389 clinical readership. We will also present the findings at other venues where we will reach  
16  
17 390 clinical staff, including the Royal College of Nursing International Nursing Research  
18  
19 391 Conference, local Falls Collaboratives, and Nursing, Midwifery and AHP Research conferences  
20  
21 392 at local Trusts. We will engage with the wider public via a project website, where links to  
22  
23 393 publications will be provided, and social media, e.g. Twitter.  
24  
25  
26  
27  
28 394

### 30 395 **Acknowledgements**

31  
32 396 This research is funded by the National Institute for Health Research (NIHR) Health Services  
33  
34 397 and Delivery Research (HS&DR) Programme (project number NIHR129488). The views and  
35  
36 398 opinions expressed are those of the author and do not necessarily reflect those of the HS&DR  
37  
38 399 Programme, NIHR, NHS or the Department of Health.  
39  
40  
41  
42 400

### 44 401 **Author Contributions**

45  
46  
47 402 RR is Principal Investigator and guarantor for the review. She conceived, designed, and  
48  
49 403 secured funding for the review in collaboration with JW, NA, FH, DD, HS, NH, PG, SW, CT, and  
50  
51 404 DW. All authors provided input into various aspects of the design of the review. In particular,  
52  
53 405 JW developed search strategies and advised on methods for assessing strength of evidence,  
54  
55 406 NA advised on realist methods, FH and CT advised on literature on falls, HS and SW advised  
56  
57 407 on current practices for falls risk assessment in the NHS, FH, DD, HS, NH, PG, CT, HZ, and CD  
58  
59  
60

1  
2  
3 408 advised on appropriate journals to search, DW, RR, NA, and LM developed the plan for lay  
4  
5  
6 409 researcher involvement in the study, and all authors contributed to clarifying and refining  
7  
8 410 inclusion and exclusion criteria. RR led the writing of this protocol manuscript and all authors  
9  
10 411 have revised drafts and read and approved the final manuscript.  
11  
12

13 412

### 15 413 **Funding statement**

17  
18 414 This research is funded by the National Institute for Health Research (NIHR) Health Services  
19  
20 415 and Delivery Research (HS&DR) Programme (project number NIHR129488).  
21  
22

23 416

### 25 417 **Competing interests statement**

27  
28 418 The authors declare that they have no competing interests.  
29  
30

31 419

### 32 420 **Additional files**

34  
35 421 Additional file 1: Checklist of PRISMA-P reporting standards  
36  
37

38 422 Additional file 2: Practitioner theories example search strategy  
39

40 423 Additional file 3: Academic theories example search strategy  
41  
42

43 424

### 44 425 **References**

- 46  
47 426 1. Becker C, Woo J, Todd C. Falls. In: Michel J-P, Beattie BL, Martin FC, Walston JD, editors.  
48 427 Oxford Textbook for Geriatric Medicine. 3rd ed. Oxford: Oxford University Press; 2017.  
49 428 2. NHS Improvement. The incidence and costs of inpatient falls in hospitals. London: NHS  
50 429 Improvement; 2017.  
51 430 3. Oliver D, Healey F, Haines TP. Preventing Falls and Fall-Related Injuries in Hospitals. Clin  
52 431 Geriatr Med. 2010;26(4):645-92.  
53 432 4. Murray GR, Cameron ID, Cumming RG. The Consequences of Falls in Acute and Subacute  
54 433 Hospitals in Australia That Cause Proximal Femoral Fractures. J Am Geriatr Soc. 2007;55(4):577-82.  
55 434 5. Royal College of Physicians. National Audit of Inpatient Falls: audit report 2017. London:  
56 435 Royal College of Physicians; 2017.  
57 436 6. England PH. Falls and fracture consensus statement: Supporting commissioning for  
58 437 prevention. 2017.  
59  
60

- 1  
2  
3 438 7. The Health Foundation. Closing the gap through clinical communities: The FallSafe project.  
4 439 London: The Health Foundation; 2012.
- 5 440 8. Oliver D, Killick S, Even T, Willmott M. Do falls and falls-injuries in hospital indicate negligent  
6 441 care—and how big is the risk? A retrospective analysis of the NHS Litigation Authority Database of  
7 442 clinical negligence claims, resulting from falls in hospitals in England 1995 to 2006. *Quality and  
8 443 Safety in Health Care*. 2008;17(6):431-6.
- 9 444 9. Oliver D, Britton M, Seed P, Martin FC, Hopper AH. Development and evaluation of evidence  
10 445 based risk assessment tool (STRATIFY) to predict which elderly inpatients will fall: case-control and  
11 446 cohort studies. *BMJ*. 1997;315(7115):1049-53.
- 12 447 10. Oliver D. Falls risk-prediction tools for hospital inpatients. Time to put them to bed? *Age  
13 448 Ageing*. 2008;37(3):248-50.
- 14 449 11. National Institute for Health and Clinical Excellence. Falls in older people: assessing risk and  
15 450 prevention: clinical guideline. London: NICE; 2013.
- 16 451 12. Royal College of Physicians. National Audit of Inpatient Falls (NAIF): audit report 2020.  
17 452 London: Royal College of Physicians; 2020.
- 18 453 13. Carroll DL, Dykes PC, Hurley AC. Patients' perspectives of falling while in an acute care  
19 454 hospital and suggestions for prevention. *Appl Nurs Res*. 2010;23(4):238-41.
- 20 455 14. Haines TP, Lee D-CA, O'Connell B, McDermott F, Hoffmann T. Why do hospitalized older  
21 456 adults take risks that may lead to falls? *Health Expectations*. 2015;18(2):233-49.
- 22 457 15. Radecki B, Reynolds S, Kara A. Inpatient fall prevention from the patient's perspective: A  
23 458 qualitative study. *Appl Nurs Res*. 2018;43:114-9.
- 24 459 16. Shuman C, Liu J, Montie M, Galinato JG, Todd MA, Hegstad M, et al. Patient perceptions and  
25 460 experiences with falls during hospitalization and after discharge. *Appl Nurs Res*. 2016;31:79-85.
- 26 461 17. Twibell RS, Siela D, Sproat T, Coers G. Perceptions Related to Falls and Fall Prevention  
27 462 Among Hospitalized Adults. *Am J Crit Care*. 2015;24(5):e78-e85.
- 28 463 18. Pawson R. Evidence-based policy: A realist perspective. London: SAGE; 2006.
- 29 464 19. Pawson R, Greenhalgh T, Harvey G, Walshe K. Realist review – a new method of systematic  
30 465 review designed for complex policy interventions. *J Health Serv Res Policy*. 2005;10(suppl 1):21-34.
- 31 466 20. Randell R, Honey S, Alvarado N, Pearman A, Greenhalgh J, Long A, et al. Embedding robotic  
32 467 surgery into routine practice and impacts on communication and decision making: a review of the  
33 468 experience of surgical teams. *Cognition, Technology & Work*. 2016;18(2):423-37.
- 34 469 21. Khangura S, Konnyu K, Cushman R, Grimshaw J, Moher D. Evidence summaries: the  
35 470 evolution of a rapid review approach. *Systematic reviews*. 2012;1(1):1-9.
- 36 471 22. Ganann R, Ciliska D, Thomas H. Expediting systematic reviews: methods and implications of  
37 472 rapid reviews. *Implementation Science*. 2010;5(1):56.
- 38 473 23. Keen J, Greenhalgh J, Randell R, Gardner P, Waring J, Longo R, et al. Networked information  
39 474 technologies and patient safety: a protocol for a realist synthesis. *Systematic Reviews*.  
40 475 2019;8(1):307.
- 41 476 24. Wong G. Data gathering in realist reviews: Looking for needles in haystacks. In: Emmel N,  
42 477 Greenhalgh J, Manzano A, Monaghan M, Dalkin S, editors. *Doing realist research*. London: Sage;  
43 478 2018. p. 131-45.
- 44 479 25. Booth A, Harris J, Croot E, Springett J, Campbell F, Wilkins E. Towards a methodology for  
45 480 cluster searching to provide conceptual and contextual "richness" for systematic reviews of complex  
46 481 interventions: case study (CLUSTER). *BMC Med Res Methodol*. 2013;13(1):118.
- 47 482 26. Hong QN, FàBregues S, Bartlett G, Boardman F, Cargo M, Dagenais P, et al. The Mixed  
48 483 Methods Appraisal Tool (MMAT) version 2018 for information professionals and researchers.  
49 484 *Education for Information*. 2018(Preprint):1-7.
- 50 485 27. Pawson R. Digging for Nuggets: How 'Bad' Research Can Yield 'Good' Evidence. *International  
51 486 Journal of Social Research Methodology*. 2006;9(2):127-42.
- 52 487 28. Moher D, Liberati A, Tetzlaff J, Altman DG, The PG. Preferred Reporting Items for Systematic  
53 488 Reviews and Meta-Analyses: The PRISMA Statement. *PLoS Med*. 2009;6(7):e1000097.

- 1  
2  
3 489 29. Davidoff F, Dixon-Woods M, Leviton L, Michie S. Demystifying theory and its use in  
4 490 improvement. *BMJ Quality & Safety*. 2015.  
5 491 30. Funnell SC, Rogers PJ. Purposeful program theory: effective use of theories of change and  
6 492 logic models. San Francisco: John Wiley & Sons; 2011.  
7 493 31. Wong G, Greenhalgh T, Westhorp G, Buckingham J, Pawson R. RAMESES publication  
8 494 standards: realist syntheses. *BMC Med*. 2013;11(1):21.  
9 495 32. Atkins D, Best D, Briss PA, Eccles M, Falck-Ytter Y, Flottorp S, et al. Grading quality of  
10 496 evidence and strength of recommendations. *BMJ (Clinical research ed)*. 2004;328(7454):1490-  
11 497 33. Lewin S, Booth A, Glenton C, Munthe-Kaas H, Rashidian A, Wainwright M, et al. Applying  
12 498 GRADE-CERQual to qualitative evidence synthesis findings: introduction to the series.  
13 499 *Implementation Science*. 2018;13(1):2.  
14 500 34. Pawson R. Evidence-based Policy: In Search of a Method. *Evaluation*. 2002;8(2):157-81.  
15 501 35. Charles JM, Rycroft-Malone J, Aslam Rh, Hendry M, Pasterfield D, Whitaker R. Reducing  
16 502 repeat pregnancies in adolescence: applying realist principles as part of a mixed-methods systematic  
17 503 review to explore what works, for whom, how and under what circumstances. *BMC Pregnancy  
18 504 Childbirth*. 2016;16(1):271.  
19 505 36. Rivas C, Vigurs C, Cameron J, Yeo L. A realist review of which advocacy interventions work  
20 506 for which abused women under what circumstances. *Cochrane Database of Systematic Reviews*.  
21 507 2019(6).

22  
23  
24  
25 508  
26  
27  
28  
29  
30  
31  
32  
33  
34  
35  
36  
37  
38  
39  
40  
41  
42  
43  
44  
45  
46  
47  
48  
49  
50  
51  
52  
53  
54  
55  
56  
57  
58  
59  
60

## PRISMA-P 2015 Checklist

What supports and constrains the implementation of multifactorial falls risk assessment and tailored multifactorial falls prevention interventions in acute hospitals? Protocol for a realist review (Randell et al.)

| Section/topic                     | #  | Checklist item                                                                                                                                                                                  | Information reported                |                                     | Line number(s) |
|-----------------------------------|----|-------------------------------------------------------------------------------------------------------------------------------------------------------------------------------------------------|-------------------------------------|-------------------------------------|----------------|
|                                   |    |                                                                                                                                                                                                 | Yes                                 | No                                  |                |
| <b>ADMINISTRATIVE INFORMATION</b> |    |                                                                                                                                                                                                 |                                     |                                     |                |
| <b>Title</b>                      |    |                                                                                                                                                                                                 |                                     |                                     |                |
| Identification                    | 1a | Identify the report as a protocol of a systematic review                                                                                                                                        | <input checked="" type="checkbox"/> | <input type="checkbox"/>            | 1              |
| Update                            | 1b | If the protocol is for an update of a previous systematic review, identify as such                                                                                                              | <input type="checkbox"/>            | <input checked="" type="checkbox"/> | Not applicable |
| <b>Registration</b>               | 2  | If registered, provide the name of the registry (e.g., PROSPERO) and registration number in the Abstract                                                                                        | <input checked="" type="checkbox"/> | <input type="checkbox"/>            | 70             |
| <b>Authors</b>                    |    |                                                                                                                                                                                                 |                                     |                                     |                |
| Contact                           | 3a | Provide name, institutional affiliation, and e-mail address of all protocol authors; provide physical mailing address of corresponding author                                                   | <input checked="" type="checkbox"/> | <input type="checkbox"/>            | 5-28           |
| Contributions                     | 3b | Describe contributions of protocol authors and identify the guarantor of the review                                                                                                             | <input checked="" type="checkbox"/> | <input type="checkbox"/>            | 399-403        |
| <b>Amendments</b>                 | 4  | If the protocol represents an amendment of a previously completed or published protocol, identify as such and list changes; otherwise, state plan for documenting important protocol amendments | <input checked="" type="checkbox"/> | <input type="checkbox"/>            | 360-361        |
| <b>Support</b>                    |    |                                                                                                                                                                                                 |                                     |                                     |                |
| Sources                           | 5a | Indicate sources of financial or other support for the review                                                                                                                                   | <input checked="" type="checkbox"/> | <input type="checkbox"/>            | 406-407        |
| Sponsor                           | 5b | Provide name for the review funder and/or sponsor                                                                                                                                               | <input checked="" type="checkbox"/> | <input type="checkbox"/>            | 406-407        |
| Role of sponsor/funder            | 5c | Describe roles of funder(s), sponsor(s), and/or institution(s), if any, in developing the protocol                                                                                              | <input checked="" type="checkbox"/> | <input type="checkbox"/>            | 394-396        |
| <b>INTRODUCTION</b>               |    |                                                                                                                                                                                                 |                                     |                                     |                |
| <b>Rationale</b>                  | 6  | Describe the rationale for the review in the context of what is already known                                                                                                                   | <input checked="" type="checkbox"/> | <input type="checkbox"/>            | 96-156         |
| <b>Objectives</b>                 | 7  | Provide an explicit statement of the question(s) the review will address with reference to participants, interventions, comparators, and outcomes (PICO)                                        | <input checked="" type="checkbox"/> | <input type="checkbox"/>            | 157-161        |

| Section/topic                             | #   | Checklist item                                                                                                                                                                                                                              | Information reported                |                                     | Line number(s)                     |
|-------------------------------------------|-----|---------------------------------------------------------------------------------------------------------------------------------------------------------------------------------------------------------------------------------------------|-------------------------------------|-------------------------------------|------------------------------------|
|                                           |     |                                                                                                                                                                                                                                             | Yes                                 | No                                  |                                    |
| <b>METHODS</b>                            |     |                                                                                                                                                                                                                                             |                                     |                                     |                                    |
| <b>Eligibility criteria</b>               | 8   | Specify the study characteristics (e.g., PICO, study design, setting, time frame) and report characteristics (e.g., years considered, language, publication status) to be used as criteria for eligibility for the review                   | <input checked="" type="checkbox"/> | <input type="checkbox"/>            | 229-260, 323-335                   |
| <b>Information sources</b>                | 9   | Describe all intended information sources (e.g., electronic databases, contact with study authors, trial registers, or other grey literature sources) with planned dates of coverage                                                        | <input checked="" type="checkbox"/> | <input type="checkbox"/>            | 191-208, 298-320                   |
| <b>Search strategy</b>                    | 10  | Present draft of search strategy to be used for at least one electronic database, including planned limits, such that it could be repeated                                                                                                  | <input checked="" type="checkbox"/> | <input type="checkbox"/>            | Provided as additional files       |
| <b>STUDY RECORDS</b>                      |     |                                                                                                                                                                                                                                             |                                     |                                     |                                    |
| Data management                           | 11a | Describe the mechanism(s) that will be used to manage records and data throughout the review                                                                                                                                                | <input checked="" type="checkbox"/> | <input type="checkbox"/>            | 217-219, 264-265, 268-272, 344-346 |
| Selection process                         | 11b | State the process that will be used for selecting studies (e.g., two independent reviewers) through each phase of the review (i.e., screening, eligibility, and inclusion in meta-analysis)                                                 | <input checked="" type="checkbox"/> | <input type="checkbox"/>            | 222-224, 323                       |
| Data collection process                   | 11c | Describe planned method of extracting data from reports (e.g., piloting forms, done independently, in duplicate), any processes for obtaining and confirming data from investigators                                                        | <input checked="" type="checkbox"/> | <input type="checkbox"/>            | 264-269, 344-346                   |
| <b>Data items</b>                         | 12  | List and define all variables for which data will be sought (e.g., PICO items, funding sources), any pre-planned data assumptions and simplifications                                                                                       | <input checked="" type="checkbox"/> | <input type="checkbox"/>            | 264-267, 344-346                   |
| <b>Outcomes and prioritization</b>        | 13  | List and define all outcomes for which data will be sought, including prioritization of main and additional outcomes, with rationale                                                                                                        | <input checked="" type="checkbox"/> | <input type="checkbox"/>            | 265-267, 344-346                   |
| <b>Risk of bias in individual studies</b> | 14  | Describe anticipated methods for assessing risk of bias of individual studies, including whether this will be done at the outcome or study level, or both; state how this information will be used in data synthesis                        | <input checked="" type="checkbox"/> | <input type="checkbox"/>            | 339-344                            |
| <b>DATA</b>                               |     |                                                                                                                                                                                                                                             |                                     |                                     |                                    |
| <b>Synthesis</b>                          | 15a | Describe criteria under which study data will be quantitatively synthesized                                                                                                                                                                 | <input type="checkbox"/>            | <input checked="" type="checkbox"/> | Not appropriate for realist review |
|                                           | 15b | If data are appropriate for quantitative synthesis, describe planned summary measures, methods of handling data, and methods of combining data from studies, including any planned exploration of consistency (e.g., $I^2$ , Kendall's tau) | <input type="checkbox"/>            | <input checked="" type="checkbox"/> | Not appropriate for realist review |

| Section/topic                            | #   | Checklist item                                                                                                              | Information reported                |                                     | Line number(s)                     |
|------------------------------------------|-----|-----------------------------------------------------------------------------------------------------------------------------|-------------------------------------|-------------------------------------|------------------------------------|
|                                          |     |                                                                                                                             | Yes                                 | No                                  |                                    |
|                                          | 15c | Describe any proposed additional analyses (e.g., sensitivity or subgroup analyses, meta-regression)                         | <input type="checkbox"/>            | <input checked="" type="checkbox"/> | Not appropriate for realist review |
|                                          | 15d | If quantitative synthesis is not appropriate, describe the type of summary planned                                          | <input checked="" type="checkbox"/> | <input type="checkbox"/>            | 272-280, 355-358                   |
| <b>Meta-bias(es)</b>                     | 16  | Specify any planned assessment of meta-bias(es) (e.g., publication bias across studies, selective reporting within studies) | <input checked="" type="checkbox"/> | <input type="checkbox"/>            | 347-352                            |
| <b>Confidence in cumulative evidence</b> | 17  | Describe how the strength of the body of evidence will be assessed (e.g., GRADE)                                            | <input checked="" type="checkbox"/> | <input type="checkbox"/>            | 362-377                            |



1  
2  
3 **What supports and constrains the implementation of multifactorial falls risk**  
4 **assessment and tailored multifactorial falls prevention interventions in acute**  
5 **hospitals? Protocol for a realist review (Randell et al.)**  
6

7 **Additional file 2: Practitioner Theories Search Strategy Example**  
8

9 **Ovid MEDLINE(R) and Epub Ahead of Print, In-Process & Other Non-Indexed Citations**  
10 **and Daily <1946 to July 22, 2020>**  
11

- 12  
13 1 Accidental Falls/ or exp Hip Fractures/pc (25502)  
14 2 (fall or falls or faller\*).tw,kw. (147405)  
15 3 or/1-2 [falls] (155967)  
16 4 Risk Assessment/ (265290)  
17 5 risk assess\*.tw,kw. (69279)  
18 6 (fall\* adj3 (assess\* or screen\* or prevent\* or predict\*)).tw,kw. (10727)  
19 7 exp Accident Prevention/ (86820)  
20 8 or/4-7 [assessment or prevention] (391878)  
21 9 nursing time\*.jn. (39139)  
22 10 3 and 8 and 9 (26)  
23 11 nursing standard.jn. (35276)  
24 12 3 and 8 and 11 (33)  
25 13 health service\* journal.jn. (10933)  
26 14 3 and 8 and 13 (3)  
27 15 10 or 12 or 14 (62)  
28  
29  
30  
31  
32  
33  
34  
35  
36  
37  
38  
39  
40  
41  
42  
43  
44  
45  
46  
47  
48  
49  
50  
51  
52  
53  
54  
55  
56  
57  
58  
59  
60

1  
2  
3 **What supports and constrains the implementation of multifactorial falls risk**  
4 **assessment and tailored multifactorial falls prevention interventions in acute**  
5 **hospitals? Protocol for a realist review (Randell et al.)**  
6

7 **Additional file 3: Academic Theories Search Strategy Example**  
8

9 **Ovid MEDLINE(R) and Epub Ahead of Print, In-Process & Other Non-Indexed Citations**  
10 **and Daily <1946 to July 21, 2020>**  
11

12  
13 1 Accidental Falls/ or exp Hip Fractures/pc (25500)  
14 2 (fall or falls or faller\*).tw,kw. (147448)  
15 3 or/1-2 [falls] (156010)  
16 4 Risk Assessment/ (265251)  
17 5 risk assess\*.tw,kw. (69315)  
18 6 (fall\* adj3 (assess\* or screen\* or prevent\* or predict\*)).tw,kw. (10733)  
19 7 exp Accident Prevention/ (86806)  
20 8 or/4-7 [assessment or prevention] (391875)  
21 9 Hospitalization/ (107412)  
22 10 Subacute Care/ (1049)  
23 11 Hospital Units/ (10146)  
24 12 exp Hospitals/ (274581)  
25 13 Rehabilitation Centers/ (8183)  
26 14 Inpatients/ (21949)  
27 15 ((acute or sub-acute or subacute) adj3 (care or ward?)).tw,kw. (31737)  
28 16 ((rehabilitation or geriatric) adj (ward? or unit? or department?)).tw,kw. (6423)  
29 17 inpatient?.tw,kw. (107879)  
30 18 hospital\*.tw,kw. (1294309)  
31 19 or/9-18 [hospital] (1485504)  
32 20 3 and 8 and 19 [Fall assmt & prevention in hospitals] (3313)  
33 21 meta-analysis/ or "systematic review"/ (194072)  
34 22 (Literature review\* or (systematic adj2 review\*) or (narrative adj2 review\*) or (critical  
35 adj2 review\*) or scoping review\* or synthesis or meta-analys\* or "meta analysis" or (realist  
36 adj2 review\*)).ti. (551543)  
37 23 ("Search filter\*" or "search strateg\*" or "literature search\*").ab. (66610)  
38 24 or/21-23 [Systematic reviews] (635237)  
39 25 20 and 24 (139)  
40  
41  
42  
43  
44  
45  
46  
47  
48  
49  
50  
51  
52  
53  
54  
55  
56  
57  
58  
59  
60
