# Supplementary material for: What supports and constrains the implementation of multifactorial falls risk assessment and tailored multifactorial falls prevention interventions in acute hospitals? Protocol for a realist review
Source: PubMed Central journal article supplement (PMC8413962; doi:10.1136/bmjopen-2021-049765), 2021-09-02
Supplement: bmjopen-2021-049765supp002.pdf [file bmjopen-2021-049765supp002.pdf]

**What supports and constrains the implementation of multifactorial falls risk assessment and tailored multifactorial falls prevention interventions in acute hospitals? Protocol for a realist review (Randell et al.)**

**Additional file 2: Practitioner Theories Search Strategy Example**

**Ovid MEDLINE(R) and Epub Ahead of Print, In-Process & Other Non-Indexed Citations and Daily <1946 to July 22, 2020>**

- 1 Accidental Falls/ or exp Hip Fractures/pc (25502)
- 2 (fall or falls or faller\*).tw,kw. (147405)
- 3 or/1-2 [falls] (155967)
- 4 Risk Assessment/ (265290)
- 5 risk assess\*.tw,kw. (69279)
- 6 (fall\* adj3 (assess\* or screen\* or prevent\* or predict\*)).tw,kw. (10727)
- 7 exp Accident Prevention/ (86820)
- 8 or/4-7 [assessment or prevention] (391878)
- 9 nursing time\*.jn. (39139)
- 10 3 and 8 and 9 (26)
- 11 nursing standard.jn. (35276)
- 12 3 and 8 and 11 (33)
- 13 health service\* journal.jn. (10933)
- 14 3 and 8 and 13 (3)
- 15 10 or 12 or 14 (62)
