# Supplementary material for: What supports and constrains the implementation of multifactorial falls risk assessment and tailored multifactorial falls prevention interventions in acute hospitals? Protocol for a realist review
Source: PubMed Central journal article supplement (PMC8413962; doi:10.1136/bmjopen-2021-049765), 2021-09-02
Supplement: bmjopen-2021-049765supp003.pdf [file bmjopen-2021-049765supp003.pdf]

**What supports and constrains the implementation of multifactorial falls risk assessment and tailored multifactorial falls prevention interventions in acute hospitals? Protocol for a realist review (Randell et al.)**

**Additional file 3: Academic Theories Search Strategy Example**

**Ovid MEDLINE(R) and Epub Ahead of Print, In-Process & Other Non-Indexed Citations and Daily <1946 to July 21, 2020>**

- 1 Accidental Falls/ or exp Hip Fractures/pc (25500)
- 2 (fall or falls or faller\*).tw,kw. (147448)
- 3 or/1-2 [falls] (156010)
- 4 Risk Assessment/ (265251)
- 5 risk assess\*.tw,kw. (69315)
- 6 (fall\* adj3 (assess\* or screen\* or prevent\* or predict\*)).tw,kw. (10733)
- 7 exp Accident Prevention/ (86806)
- 8 or/4-7 [assessment or prevention] (391875)
- 9 Hospitalization/ (107412)
- 10 Subacute Care/ (1049)
- 11 Hospital Units/ (10146)
- 12 exp Hospitals/ (274581)
- 13 Rehabilitation Centers/ (8183)
- 14 Inpatients/ (21949)
- 15 ((acute or sub-acute or subacute) adj3 (care or ward?)).tw,kw. (31737)
- 16 ((rehabilitation or geriatric) adj (ward? or unit? or department?)).tw,kw. (6423)
- 17 inpatient?.tw,kw. (107879)
- 18 hospital\*.tw,kw. (1294309)
- 19 or/9-18 [hospital] (1485504)
- 20 3 and 8 and 19 [Fall assmt & prevention in hospitals] (3313)
- 21 meta-analysis/ or "systematic review"/ (194072)
- 22 (Literature review\* or (systematic adj2 review\*) or (narrative adj2 review\*) or (critical adj2 review\*) or scoping review\* or synthesis or meta-analys\* or "meta analysis" or (realist adj2 review\*)).ti. (551543)
- 23 ("Search filter\*" or "search strateg\*" or "literature search\*").ab. (66610)
- 24 or/21-23 [Systematic reviews] (635237)
- 25 20 and 24 (139)
